# Supplementary material for: Sulfur dioxide retrievals from TROPOMI onboard Sentinel-5 Precursor: Algorithm Theoretical Basis
Source: Copernicus journal article supplement (doi:10.5194/amt-2016-309), 2016-09-22
Supplement: Supplementary file [file amt-2016-309-AC2-supplement.pdf]

# Sulfur dioxide retrievals from TROPOMI onboard Sentinel-5

## Precursor: Algorithm Theoretical Basis

N. Theys<sup>1</sup>, I. De Smedt<sup>1</sup>, H. Yu<sup>1</sup>, T. Danckaert<sup>1</sup>, J. van Gent<sup>1</sup>, C. Hörmann<sup>2</sup>, T. Wagner<sup>2</sup>, P. Hedelt<sup>3</sup>, H. Bauer<sup>3</sup>, F. Romahn<sup>3</sup>, M. Pedernana<sup>3</sup>, D. Loyola<sup>3</sup>, M. Van Roozendaal<sup>1</sup>

[1]{Royal Belgian Institute for Space Aeronomy (BIRA-IASB), Brussels, Belgium}

[2]{Max Planck Institute for Chemistry (MPIC), Hahn-Meitner-Weg 1, 55128 Mainz, Germany}

[3]{Institut für Methodik der Fernerkundung (IMF), Deutsches Zentrum für Luft und Raumfahrt (DLR), Oberpfaffenhofen, Germany}

Correspondence to N. Theys (theys@aeronomie.be)

### ABSTRACT

The TROPospheric Monitoring Instrument (TROPOMI) onboard the Copernicus Sentinel-5 Precursor (S-5P) platform will measure ultraviolet Earthshine radiances at high spectral and improved spatial resolution (pixel size of 7x3.5 km<sup>2</sup> at nadir) compared to its predecessors OMI and GOME-2. This paper presents the sulfur dioxide (SO<sub>2</sub>) vertical column retrieval algorithm implemented in the S-5P operational processor UPAS (Universal Processor for UV/VIS Atmospheric Spectrometers), and comprehensively describes its various retrieval steps. The spectral fitting is performed using the Differential Optical Absorption Spectroscopy (DOAS) method including multiple fitting windows to cope with the large range of atmospheric SO<sub>2</sub> columns encountered. It is followed by a slant column background correction scheme to reduce possible biases or across-track dependent artifacts in the data. The SO<sub>2</sub> vertical columns are obtained by applying Air Mass Factors (AMF) calculated for a set of representative a-priori profiles and accounting for various parameters influencing the retrieval sensitivity to SO<sub>2</sub>. Finally, the algorithm includes an error analysis module which is fully described here. We also discuss verification results (as part of the algorithm development) and future validation needs of the TROPOMI SO<sub>2</sub> algorithm.

## 1. INTRODUCTION

Sulfur dioxide enters the Earth's atmosphere via both natural and anthropogenic processes. Through the formation of sulfate aerosols and sulfuric acid, it plays an important role on the chemistry at local and global scales and its impact ranges from short term pollution to climate forcing. While about one third of the global sulfur emissions originates from natural sources (volcanoes and biogenic dimethyl sulfide), the main contributor to the total budget is from anthropogenic emissions mainly from the combustion of fossil fuels (coal and oil) and from smelting. Over the last decades, a host of satellite-based UV-visible instruments have been used for the monitoring of anthropogenic and volcanic SO<sub>2</sub> emissions. Total vertical column density (VCD) of SO<sub>2</sub> has been retrieved with the sensors TOMS (Krueger, 1983), GOME (Eisinger and Burrows, 1998; Thomas et al., 2005; Khokar et al., 2005), SCIAMACHY (Afe et al., 2004), OMI (Krotkov et al., 2006; Yang et al., 2007, 2010; Li et al., 2013; Theys et al., 2015), GOME-2 (Richter et al., 2009; Bobrowski et al., 2010; Nowlan et al., 2011; Rix et al., 2012; Hörmann et al., 2013) and OMPS (Yang et al., 2013). In particular, the Ozone Monitoring Instrument (OMI) has largely demonstrated the value of satellite UV-visible remote-sensing (1) in monitoring volcanic plumes in near-real time (Brenot et al., 2014) and changes in volcanic degassing at the global scale (Carn et al., 2016, and references therein), (2) in detecting and quantifying large anthropogenic SO<sub>2</sub> emissions, weak or unreported emission sources worldwide (Theys et al., 2015; Fioletov et al., 2016; McLinden et al., 2016) as well as investigating their long-term changes (Krotkov et al., 2016; van der A et al., 2016; He et al., 2016). An exemplary map of OMI SO<sub>2</sub> columns (Theys et al., 2015) averaged over the 2005-2009 period is shown in Figure 1, illustrating typical anthropogenic emission hotspots (China, Eastern Europe, India and the Middle East) and signals from volcanic activity (e.g. from the volcanoes in D.R. Congo).

The 7-year lifetime Sentinel-5p sensor TROPOMI (Veefkind et al., 2012) will fly on a polar low earth orbit with a wide swath of 2600 km. The TROPOMI instrument is a push-broom imaging spectrometer similar in concept as OMI. It has eight spectral bands covering UV to SWIR wavelengths. The SO<sub>2</sub> retrieval algorithm exploits measurements from band 3 (310-405 nm), with typical spectral resolution of 0.54 nm, signal-to-noise ratio of about 1000 and pixel size as good as 7x3.5 km<sup>2</sup>.

TROPOMI will continue and improve the measurement time-series of OMI SO<sub>2</sub> and other UV sensors. Owing to similar performance as OMI in terms of signal-to-noise ratio and unprecedented spatial resolution, TROPOMI will arguably discern very fine details in the SO<sub>2</sub> distribution and will be able to detect point sources with annual SO<sub>2</sub> emissions of about 10 kT/year or lower (using oversampling techniques).

This paper gives a thorough description of the operational TROPOMI SO<sub>2</sub> algorithm and reflects the S5P SO<sub>2</sub> L2 Algorithm Theoretical Basis Document v1.0. In Section 2, we first present the product requirements and briefly discuss the expected product performance in terms of precision and accuracy. It is then followed by the SO<sub>2</sub> column retrieval algorithm description. An error analysis of the retrieval method is presented in Section 3. Results from algorithm verification exercise using an independent retrieval scheme is given in Section 4. The possibilities for future validation of the retrieved SO<sub>2</sub> data product can be found in Section 5. Conclusions are given in Section 6. Additional information on data product and auxiliary data [as well as list of acronyms](#) are provided in annex.

## **2. TROPOMI SO<sub>2</sub> ALGORITHM**

### **2.1 PRODUCT REQUIREMENTS**

While UV measurements are highly sensitive to SO<sub>2</sub> at high altitudes (upper troposphere-lower stratosphere), the sensitivity to SO<sub>2</sub> concentration in the boundary layer is intrinsically limited from space due to the combined effect of scattering (Rayleigh and Mie) and ozone absorption that hamper the penetration of solar radiation into the lowest atmospheric layers. Furthermore the SO<sub>2</sub> absorption signature suffers from the interference with the ozone absorption spectrum.

The retrieval precision (or random uncertainty) is driven by the signal to noise ratio of the recorded spectra and by the retrieval wavelength interval used, the accuracy (or systematic uncertainty) is limited by the knowledge on the auxiliary parameters needed in the different retrieval steps. Among these are the treatment of other chemical interfering species, clouds and aerosol, the representation of vertical profiles (gas, temperature, pressure), and uncertainties on data from external sources (e.g., surface reflectance).

Requirements on the accuracy and precision for the data products derived from the TROPOMI measurements are specified in the GMES Sentinels 4 and 5 and 5p Mission

Requirements Document MRD (Langen et al., 2011), the Report of The Review Of User Requirements for Sentinels-4/5 (Bovensmann et al., 2011) and the Science Requirements Document for TROPOMI (van Weele et al., 2008). These requirements derive from the Composition of the Atmosphere: Progress to Applications in the user Community (CAPACITY) study (Kelder et al., 2005) and have been fine-tuned by the Composition of the Atmospheric Mission concEpts and Sentinel Observation Techniques (CAMELOT; Levelt et al., 2009) and Original and New Tropospheric composition and Air Quality measurements (ONTRAQ; Zweers et al., 2010) studies. The CAPACITY study has defined three main themes: The ozone layer (A), air quality (B), and climate (C) with further division into sub themes. Requirements for SO<sub>2</sub> have been specified for a number of these sub themes. In the following paragraphs, we discuss these requirements and the expected performances of the SO<sub>2</sub> retrieval algorithm (summary is given in Table 1).

### *Theme A3 - Ozone layer assessment*

This theme addresses the importance of measurements in the case of enhanced SO<sub>2</sub> concentrations in the stratosphere due to severe volcanic events. Long-term presence (up to several months) of SO<sub>2</sub> in the stratosphere contributes to the stratospheric aerosol loading and hence affects the climate and the stratospheric ozone budget. For such scenarios, the requirements state that the stratospheric vertical column should be monitored with a total uncertainty of 30%. Although powerful volcanic events generally produce large amounts of SO<sub>2</sub>, monitoring such a plume over extended periods of time requires the detection of the plume also after it has diluted during the weeks after the eruption.

From an error analysis of the proposed SO<sub>2</sub> algorithm (Section 3), we have assessed the major sources of uncertainty in the retrieved SO<sub>2</sub> column. One of the main contributors to the total uncertainty is instrumental noise. This source of error alone limits the precision to vertical columns above about 0.25 DU (1 DU=2.69 x 10<sup>16</sup> molec.cm<sup>-2</sup>). For SO<sub>2</sub> in the stratosphere, the summing up of the various uncertainties (Section 3) is believed to be around the required uncertainty of 30% for diluted SO<sub>2</sub> plumes, provided that the vertical column is larger than 0.5 DU. Explosive volcanic eruptions capable of injecting SO<sub>2</sub> into the stratosphere regularly show stratospheric SO<sub>2</sub> columns of a few DU to several hundreds of DU or more, as was the case, for example, for the eruptions of Mt. Kasatochi (Yang et al., 2010) and Sarychev Peak (Carn et al., 2011). For very large SO<sub>2</sub> concentrations, the dynamical use of different fitting windows (see section 2.2) enables to reach 30 % uncertainty level (see section 4).

#### *Theme B – Air quality*

This theme includes three sub themes:

B1 -Protocol monitoring: This involves the monitoring of abundances and concentrations of atmospheric constituents, driven by several agreements, such as the Gothenburg protocol, National Emission Ceilings, and EU Air Quality regulations.

B2 -Near-real time (NRT) data requirements: This comprises the relatively fast (~30 minutes) prediction and determination of surface concentrations in relation to health and safety warnings.

B3 – Assessment: This sub theme aims at answering several air quality related scientific questions, such as the effect on air quality of spatial and temporal variations in oxidizing capacity and long-range transport of atmospheric constituents.

A more detailed description of the air quality sub themes can be found in Langen et al. (2011).

1 The user requirements on SO<sub>2</sub> products are equal for all three sub themes. For the total  
2 vertical column and the tropospheric vertical column of SO<sub>2</sub>, the user requirements state an  
3 absolute maximum uncertainty of  $1.3 \times 10^{15}$  molecules cm<sup>-2</sup> or 0.05 DU. This number derives  
4 from the ESA CAPACITY study, where the number was expressed as 0.4 ppbv for a 1.5 km  
5 thick boundary layer reaching up to 850 hPa. From the uncertainty due to instrument noise  
6 only, it is clear that the 0.05 DU requirement cannot be met on a single-measurement basis.  
7 This limitation was already found in the ESA CAMELOT study (Levelt et al., 2009).

8 For anthropogenic SO<sub>2</sub> typically confined in the planetary boundary layer (PBL), calculations  
9 performed within the CAMELOT study showed that the smallest vertical column that can be  
10 detected in the PBL is of about 1-3 DU (for a signal-to-noise ratio (SNR) of 1000). Although  
11 pollution hotspots can be better identified by spatial or temporal averaging, several  
12 uncertainties (e.g. due to varying surface albedo or SO<sub>2</sub> vertical profile shape) are not  
13 averaging out and directly limit the product accuracy to about 50% or more. Though the  
14 difference between the MRD requirements and the expected TROPOMI performance is  
15 rather large, one could argue that the required threshold should not be a strict criterion in all  
16 circumstances. The user requirement of 0.05 DU represents the maximum uncertainty to  
17 distinguish (anthropogenic) pollution sources from background concentrations. Bovensmann  
18 et al. (2011) reviewed the MRD user requirements and motivated a relaxation of certain user  
19 requirements for specific conditions. For measurements in the PBL, the document proposes  
20 a relative requirement of 30-60% in order to discriminate between enhanced (> 1.5 ppbv),  
21 moderate (0.5-1.5 ppbv), and background concentrations (<0.5 ppbv). It is expected that it  
22 will be possible to discriminate these three levels by averaging (spatially-temporally)  
23 TROPOMI data.

24 For volcanic SO<sub>2</sub> plumes in the free-troposphere, a better measurement sensitivity is  
25 expected for TROPOMI. The expected precision is about 0.5 DU on the vertical column. The  
26 accuracy on the SO<sub>2</sub> vertical column will be strongly limited by the SO<sub>2</sub> plume height and the  
27 cloud conditions. As these parameters are highly variable in practice, it is difficult to  
28 ascertain the product accuracy for these conditions.

## 2.2 ALGORITHM DESCRIPTION

The first algorithm to retrieve SO<sub>2</sub> columns from space-borne UV measurements was developed based on a few wavelength pairs (for TOMS) and has been subsequently applied and refined for OMI measurements (e.g., Krotkov et al., 2006; Yang et al., 2007 and references therein). Current algorithms exploit back-scattered radiance measurements in a wide spectral range using a direct fitting approach (Yang et al., 2010; Nowlan et al., 2011), a Principal Component Analysis (PCA) method (Li et al., 2013) or (some form of) Differential Optical Absorption Spectroscopy (DOAS; Platt and Stutz, 2008), see e.g. Richter et al. (2009), Hörmann et al. (2013), Theys et al. (2015).

Direct fitting schemes in which on-the-fly radiative transfer simulations are made for all concerned wavelengths and resulting simulated spectra are adjusted to the spectral observations, are in principle the most accurate. They are able to cope with very large SO<sub>2</sub> columns (such as those occurring during explosive volcanic eruptions), i.e. conditions typically leading to a strongly non-linear relation between the SO<sub>2</sub> signal and the VCD. However, the main disadvantage of direct fitting algorithms with respect to DOAS (or PCA), is that they are computationally expensive and are out of reach for TROPOMI operational near-real-time processing, for which the Level 1b data flow is expected to be massive and deliver around 1,5 million spectral measurements per orbit (~15 orbits daily) for band 3 (with a corresponding data size of 6 gigabytes). To reach the product accuracy and processing performance requirements, the here adopted approach applies DOAS in three different fitting windows (within the 310-390 nm spectral range) that are still sensitive enough to SO<sub>2</sub> but less affected by non-linear effects (Bobrowski et al., 2010; Hörmann et al., 2013).

Figure 2 shows the full flow diagram of the SO<sub>2</sub> retrieval algorithm including the dependencies on auxiliary data and other L2 products. The algorithm and its application to OMI data is also described in Theys et al. (2015), although there are differences in some settings. The baseline operation flow of the scheme is based on a DOAS retrieval algorithm and is identical to that implemented in the retrieval algorithm for HCHO (also developed by BIRA-IASB, see De Smedt et al., 2016). The main output parameters of the algorithm are SO<sub>2</sub> vertical column density, slant column density, air mass factor, averaging kernels (AK) and error estimates. Here, we will first briefly discuss the principle of the DOAS VCD retrieval before discussing the individual steps of the process in more details.

First, the radiance and irradiance data are read from a S5P L1b file, along with geolocation data such as pixel coordinates and observation geometry (sun and viewing angles). At this stage also cloud cover information (see Table A3) is obtained from the S5P cloud L2 data, as required for the calculation of the AMF, later in the scheme. Then relevant absorption cross section data, as well as characteristics of the instrument (e.g., slit functions) are used as input for the SO<sub>2</sub> slant column density determination. As a baseline, the slant column fit is done in a sensitive window from 312 to 326 nm. For pixels with a strong SO<sub>2</sub> signal, results from alternative windows, where the SO<sub>2</sub> absorption is weaker can be used instead. An empirical offset correction (dependent on the fitting window used) is then applied to the SCD. The latter correction accounts for systematic biases in the SCDs. Following the SCD determination, the AMF is estimated based on a pre-calculated weighting functions (or box-AMFs) look-up table (LUT). This look-up-table is generated using the Linearized Discrete Ordinate Radiative Transfer (LIDORT) code (Spurr, 2008) and has several entries: cloud cover data, topographic information, observation geometry, surface albedo, effective wavelength (representative of the fitting window used), total ozone column and the shape of the vertical SO<sub>2</sub> profile. The algorithm also includes an error calculation and retrieval characterization module (Section 3) that computes the averaging kernels (Eskes & Boersma, 2003), which characterize the vertical sensitivity of the measurement and which are required for comparison with other types of data (Veefkind et al., 2012).

The final SO<sub>2</sub> vertical column is obtained by:

$$N_v = \frac{N_s - N_s^{back}}{M} \quad (1)$$



where the main quantities are the vertical column ( $N_v$ ), the slant column density ( $N_s$ ) and the values used for the background correction ( $N_s^{back}$ ).  $M$  is the air mass factor.

### 2.2.1 Slant column retrieval

The backscattered radiance spectrum recorded by the space instrument differs from the solar spectrum because of the interactions of the photons with the Earth's atmosphere and surface reflection. Hence the reflectance spectra contains spectral features that can be related to the various absorbing species and their amounts in the atmosphere. The DOAS method aims at the separation of the highly structured trace gas absorption spectra and broadband spectral structures. The technique relies on a number of assumptions that can be summarized as follows:

- a. The spectral analysis and atmospheric radiative transfer computations are treated separately, by considering one averaged atmospheric light path of the photons travelling from the sun to the instrument.
- b. The absorption cross-sections are not strongly dependent on pressure and temperature. Additionally, the averaged light path should be weakly dependent on the wavelength - for the fitting window used - which enables defining an effective absorption (slant) column density. It should be noted that strictly this is not valid for the  $\text{SO}_2$  DOAS retrieval because of strong absorption by ozone and in some cases  $\text{SO}_2$  itself (for large  $\text{SO}_2$  amounts).
- c. Spectrally smoothed structures due broadband absorption, scattering and reflection processes can be well reproduced by a low-order polynomial as a function of wavelength.

Photons collected by the satellite instrument may have followed very different light paths through the atmosphere depending on their scattering history. However, a single effective light path is assumed, which represents an average of the complex paths of all reflected and scattered solar photons reaching the instrument within the spectral interval used for the retrieval. This simplification is valid if the effective light path is reasonably constant over the considered wavelength range. The spectral analysis can be described by the following equation:

$$\ln \frac{\pi I(\lambda)}{\mu_0 E_0(\lambda)} = - \sum_j \sigma_j(\lambda) N_{S_j} + \sum_p c_p \lambda^p \quad (2)$$

Here,  $I(\lambda)$  is the observed backscattered Earthshine radiance [ $\text{W m}^{-2} \text{nm}^{-1} \text{sr}^{-1}$ ],  $E_0$  is the solar irradiance [ $\text{W m}^{-2} \text{nm}^{-1}$ ] and  $\mu_0 = \cos \theta_0$ . The first term on the right hand side indicates all relevant absorbing species with absorption cross-sections  $\sigma_j$  [ $\text{cm}^2 \text{molec}^{-1}$ ]. Integration of the number densities of these species along the effective light path gives the slant column density  $N_{S_j}$  [ $\text{molec.cm}^{-2}$ ]. Equation 2 can be solved by least-squares fitting techniques (Platt and Stutz, 2008) for the slant column values. The final term in Eq. 2 is the polynomial representing broad band absorption and (Rayleigh and Mie) scattering structures in the observed spectrum and also accounts for possible errors such as e.g. uncorrected instrument degradation effects, uncertainties in the radiometric calibration or possible residual (smooth) polarization response effects not accounted for in the level 0-1 processing.

Apart from the cross-sections for the trace gases of interest, additional fit parameters need to be introduced to account for the effect of several physical phenomena on the fit result. For  $\text{SO}_2$  fitting, these are the filling-in of Fraunhofer lines (Ring effect) and the need for an intensity offset-correction. In the above, we have assumed that for the ensemble of observed photons a single effective light path can be assumed over the adopted wavelength fitting interval. For the observation of (generally small)  $\text{SO}_2$  concentrations at large solar zenith angles (SZA) this is not necessarily the case. For such long light paths, the large contribution of  $\text{O}_3$  absorption may lead to negative  $\text{SO}_2$  retrievals. This may be mitigated by taking the wavelength dependence of the  $\text{O}_3$  SCD over the fitting window into account, as will be described in the next section.

The different parts of the DOAS retrieval are detailed in the next subsections and Table 2 gives a summary of settings used to invert  $\text{SO}_2$  slant columns. Note that in Eq. 2, the daily solar irradiance is used as a baseline for the reference spectrum. As a better option, it is generally preferred to use daily averaged radiances, selected for each across-track position, in the equatorial Pacific. In the NRT algorithm, the last valid day can be used to derive the reference spectra, while in the offline version of the algorithm, the current day should be used. Based on OMI experience, it would allow e.g. for better handling of instrumental

artifacts and degradation of the recorded spectra for each detector. At the time of writing, it is planned to test this option during the S5P commissioning phase.

#### 2.2.1.1 Wavelength fitting windows

DOAS measurements are in principle applicable to all gases having suitable narrow absorption bands in the UV, visible, or near IR regions. However, the generally low concentrations of these compounds in the atmosphere, and the limited signal-to-noise ratio of the spectrometers, restrict the number of trace gases that can be detected. Many spectral regions contain several interfering absorbers and correlations between absorber cross-sections can sometimes lead to systematic biases in the retrieved slant columns. In general, the correlation between cross-sections decreases if the wavelength interval is extended, but then the assumption of a single effective light path defined for the entire wavelength interval may not be fully satisfied, leading to systematic misfit effects that may also introduce biases in the retrieved slant columns (e.g., Pukītė et al., 2010). To optimize DOAS retrieval settings, a trade-off has to be found between these effects. In the UV-visible spectral region, the cross-section spectrum of SO<sub>2</sub> has its strongest bands in the 280-320 nm range (Figure 3). For the short wavelengths in this range, the SO<sub>2</sub> signal however suffers from a strong increase in Rayleigh scattering and ozone absorption. In practice, this leads to a very small SO<sub>2</sub> signal in the satellite spectra compared to ozone absorption, especially for tropospheric SO<sub>2</sub>. Consequently, SO<sub>2</sub> is traditionally retrieved (for GOME, SCIAMACHY, GOME-2, OMI) using sensitive windows in the 310-326 nm range. Note that even in this range the SO<sub>2</sub> absorption can be three orders of magnitude lower than that of ozone.

The TROPOMI SO<sub>2</sub> algorithm is using a multiple windows approach:

- 312-326 nm: classical fitting window, ideal for small columns. This window is used as baseline. If non-linear effects due to high SO<sub>2</sub> amounts are encountered, one of the two following windows will be used instead.
- 325-335 nm: in this window, differential SO<sub>2</sub> spectral features are one order of magnitude smaller than in the classical window. It allows the retrieval of moderate SO<sub>2</sub> columns, an approach similar to the one described by Hörmann et al. (2013).

- 360-390 nm: SO<sub>2</sub> absorption bands are 2-3 orders of magnitude weaker than in the classical window and are best suited for the retrieval of extremely high SO<sub>2</sub> columns (Bobrowski et al., 2010)

Note that in the 325-335 nm and 360-390 nm windows the Rayleigh scattering and ozone absorption are less important than in the baseline 312-326 nm window (see also Figure 3).

Specifically, in the first two intervals, absorption cross-sections of O<sub>3</sub> at 228K and 243K are included in the fit and, to better cope with the strong (non-linear) ozone absorption at short wavelengths, the retrieval also includes two pseudo cross-sections following the approach of Puķīte et al. (2010):  $\lambda\sigma_{O_3}$  and  $\sigma_{O_3}^2$  calculated from the O<sub>3</sub> cross-section spectrum at 228K. The correction for the Ring effect is based on the technique outlined by Vountas et al. (1998). This technique involves a Principal Component Analysis of a set of Ring spectra, calculated for a range of solar zenith angles. The first two of the resulting eigenvectors appear to accurately describe the Ring spectra, with the first eigenvector representing the filling-in of Fraunhofer lines and the second mostly representing the filling-in of gas absorption features. In the retrieval algorithm, these vectors are determined by orthogonalizing two Ring spectra, calculated by LIDORT-RRS (Spurr et al., 2008), a version of LIDORT accounting for rotational Raman scattering, for a low SZA (20°) and a high SZA (87°), respectively.

#### 2.2.1.2 Wavelength calibration and convolution to TROPOMI resolution

The quality of a DOAS fit critically depends on the accuracy of the alignment between the earthshine radiance spectrum, the reference spectrum and the cross-sections. Although the Level 1b will contain a spectral assignment, an additional spectral calibration is part of the SO<sub>2</sub> algorithm. Moreover, the DOAS spectral analysis includes also the fit of shift and stretch of radiance spectra because the TROPOMI spectral registration will differ from one ground-pixel to another e.g. due to thermal variations over the orbit as well as due to inhomogeneous filling of the slit in flight direction.

The wavelength registration of the reference spectrum can be fine-tuned by means of a calibration procedure making use of the solar Fraunhofer lines. To this end, a reference solar atlas  $E_s$  accurate in absolute vacuum wavelength to better than 0.001 nm (Chance and

1 Kurucz, 2010) is degraded at the resolution of the instrument, through convolution by the  
2 TROPOMI instrumental slit function.

3 Using a non-linear least-squares approach, the shift ( $\Delta_i$ ) between the reference solar atlas  
4 and the TROPOMI irradiance is determined in a set of equally spaced sub-intervals covering a  
5 spectral range large enough to encompass all relevant fitting intervals. The shift is derived  
6 according to the following equation:

$$E_0(\lambda) = E_s(\lambda - \Delta_i) \quad (3)$$

7 where  $E_s$  is the solar spectrum convolved at the resolution of the instrument and  $\Delta_i$  is the  
8 shift in sub-interval  $i$ . A polynomial is then fitted through the individual points in order to  
9 reconstruct an accurate wavelength calibration  $\Delta(\lambda)$  for the complete analysis interval. Note  
10 that this approach allows to compensate for stretch and shift errors in the original  
11 wavelength assignment.

12 In the case of TROPOMI, the procedure is complicated by the fact that such calibrations must  
13 be performed (and stored) for each separate spectral field on the CCD detector array. Indeed  
14 due to the imperfect characteristics of the imaging optics, each row of the TROPOMI  
15 instrument must be considered as a separate spectrometer for analysis purposes.

16 In a subsequent step of the processing, the absorption cross-sections of the different trace  
17 gases must be convolved with the instrumental slit function. The baseline approach is to use  
18 slit functions determined as part of the TROPOMI key data. Slit functions are delivered for  
19 each binned spectrum and as a function of wavelength. Note that an additional feature of  
20 the prototype algorithm allows to dynamically fit for an effective slit function of known line  
21 shape (e.g. asymmetric Gaussian). This can be used for verification and monitoring purpose  
22 during commissioning and later on during the mission.

23 More specifically, wavelength calibrations are made for each TROPOMI orbit as follows:

- 24 1. The TROPOMI irradiances (one for each row of the CCD) are calibrated in wavelength  
25 over the 310-390 nm wavelength range, using 10 sub-windows.
- 26 2. The earthshine radiances and the absorption cross-sections are interpolated (cubic  
27 spline interpolation) on the calibrated wavelength grid, prior to the [DOAS](#) analysis.

3. During spectral fitting, shift and stretch parameters are further derived to align radiance and irradiance spectra. The reference wavelength grid used in the DOAS procedure is the (optimized) grid of the TROPOMI solar irradiance.

#### 2.2.1.3 Spike removal algorithm

A method to remove individual hot pixels or **detector** pixels affected by the South Atlantic Anomaly has been presented for NO<sub>2</sub> retrievals in Richter et al. (2011). Often only a few individual detector pixels are affected and in these cases, it is possible to identify and remove the noisy points from the fit. However, as the amplitude of the distortion is usually only of the order of a few percent or less, it cannot always be found in the highly structured spectra themselves. Higher sensitivity for spikes can be achieved by analysing the residual of the fit where the contribution of the Fraunhofer lines, scattering, and absorption is already removed.

When the residual for a single **detector** pixel exceeds the average residual of all **detector** pixels by a chosen threshold ratio (the tolerance factor), the pixel is excluded from the analysis, in an iterative process. This procedure is repeated until no further outliers are identified, or until the maximum number of iterations is reached (here fixed to 3). This is especially important to handle the degradation of 2-D detector arrays such as OMI or TROPOMI. However, this improvement of the algorithm has a non-negligible impact on the time of processing. At the time of writing, the exact values for the tolerance factor and maximum number of iterations of the spike removal procedure are difficult to ascertain and will only be known during operations. To assess the impact on the processing time, test retrievals have been done on OMI spectra using a tolerance factor of 5, and a limit of 3 iterations (this could be relaxed) and it leads to an increase in processing time by a factor of 1.5.

#### 2.2.1.4 Fitting window selection

The implementation of the multiple fitting windows retrieval requires selection criteria for the transition from one window to another. These criteria are based on the measured  $\text{SO}_2$  slant columns. As a baseline, the  $\text{SO}_2$  SCD in the 312-326 nm window will be retrieved for each satellite pixel. When the resulting value exceeds a certain criterion, the slant column retrieval is taken from an alternative window. As part of the algorithm development and during the verification exercise (Section 4), closed-loop retrievals have been performed and application of the algorithm to real data from the GOME-2 and OMI instruments lead to threshold values and criteria as given in Table 3.

#### 2.2.2 Offset correction

When applying the algorithm to OMI and GOME-2 data, across-track/viewing angle dependent residuals of  $\text{SO}_2$  were found over clean areas and negative  $\text{SO}_2$  SCDs are found at high SZA which need to be corrected (note that this is a common problem of most algorithms to retrieve  $\text{SO}_2$  from space UV sensors). A background correction scheme was found mostly necessary for the  $\text{SO}_2$  slant columns retrieved in the baseline fitting window. The adopted correction scheme depends on across-track position and measured  $\text{O}_3$  slant column as described below.

The correction is based on a parameterization of the background values that are then subtracted from the measurements. The scheme first removes pixels with high SZA ( $>70^\circ$ ) or SCDs larger than 1.5 DU (measurements with presumably real  $\text{SO}_2$ ) and then calculates the offset correction by averaging the  $\text{SO}_2$  data on an ozone slant column grid (bins of 75 DU). This is done independently for each across-track position and hemisphere, and the correction makes use of measurements averaged over a time period of two weeks preceding the measurement of interest (to improve the statistics and minimize the impact of a possible extended volcanic  $\text{SO}_2$  plume on the averaged values).

It should be noted that the  $\text{O}_3$  slant column is dependent on the wavelength when applying the approach of Pukite et al. (2010):

$$SCD(\lambda) = SCD_{T1} + SCD_{T2} + \lambda \cdot SCD_{\lambda} + \sigma_s(\lambda) SCD_s \quad (4)$$

SCD<sub>T1</sub> and SCD<sub>T2</sub> are the retrieved ozone slant columns corresponding to the ozone cross-sections at two temperatures (T1, T2) included in the fit. SCD<sub>λ</sub> and SCD<sub>s</sub> are the retrieved parameters for the two pseudo cross-sections λ.σ<sub>s</sub> and σ<sub>s</sub><sup>2</sup> (σ<sub>s</sub> being the O<sub>3</sub> cross-section at T1). In order to apply the background correction, the O<sub>3</sub> slant column expression (Eq. 4) is evaluated at 313 nm (read below).

An example of the effect of the background correction is shown in Figure 4 for OMI. One can see that after correction (top panel) the retrievals show smooth/unstriped results and values close to zero outside the polluted areas. In some regions (in particular at high latitudes), residual columns can be found, but are generally lower than 0.2 DU.

For the two additional fitting windows, residual SO<sub>2</sub> levels are relatively small in comparison to the column amounts expected to be retrieved in these windows. However, simplified background corrections are also applied to the alternative windows: the offset corrections use parameterizations of the background slant columns based on latitude (bins of 5°), cross-track position and time (two weeks moving averages as for the baseline window). To avoid contamination by strong volcanic eruptions, only the pixels are kept with SCD less than 50DU and 250DU for the fitting windows 325-335nm and 360-390nm, respectively.

It should be noted that the background corrections do not imply to save two weeks of SO<sub>2</sub> L2 data in intermediate products, but only the averaged values ( $\sum_{i=1,N} SCD_i / N$ ) over the predefined working grids (note: the numerators  $\sum_{i=1,N} SCD_i$  and denominators N are stored separately).



This background correction is well suited for the case of a 2D-detector array such as TROPOMI, for which across-track striping can possibly arise due to imperfect cross-calibration and different dead/hot pixel masks for the CCD detector regions. This instrumental effect can also be found for scanning spectrometers, but since these instruments only have one single detector, such errors do not appear as stripes. These different retrieval artefacts can be compensated (up to a certain extent) using background corrections which depend on the across-track position. All of these corrections are also meant to handle the time-dependent degradation of the instrument. Note that experiences with OMI show that the most efficient method to avoid across-track stripes in the retrievals is to use row-dependent mean radiances as control spectrum in the DOAS fit.

### 2.2.3 Air mass factors

The DOAS method assumes that the retrieved slant column (after appropriate background correction) can be converted into a vertical columns using a single air mass factor  $M$  (representative for the fitting interval):

$$M = \frac{N_s}{N_v} \quad (5)$$

which is determined by radiative transfer calculations with LIDORT version 3.3 (Spurr, 2008). The AMF calculation is based on the formulation of Palmer et al. (2001):

$$M = \int m'(p) \cdot s(p) dp \quad (6)$$

with  $m' = m(p)/C_{temp}(p)$ , where  $m(p)$  is the so-called weighting function (WF) or pressure dependent air mass factor,  $C_{temp}$  is a temperature correction (see section 2.2.3.7) and  $s$  is the SO<sub>2</sub> normalized a-priori mixing ratio profile, as function of pressure ( $p$ ).

The AMF calculation assumes Lambertian reflectors for the ground and the clouds and makes use of pre-calculated WF LUTs at 313, 326 and 375 nm (depending on the fitting window used). Calculating the AMF at these three wavelengths was found to give the best results using closed-loop retrievals (see Auxiliary material of Theys et al., 2015). The WF depends on observation geometry (solar zenith angle: SZA, line-of-sight angle: LOS, relative azimuth angle: RAA), total ozone column (TO3), scene albedo (alb), surface pressure ( $p_s$ ), cloud top pressure ( $p_{cloud}$ ) and effective cloud fraction ( $f_{eff}$ ).

Examples of SO<sub>2</sub> weighting functions are displayed in Figure 5 (as a function of height for illustration purpose) and show the typical variations of the measurement sensitivity as a function of height, wavelength and surface albedo.

The generation of the WF LUT has been done for a large range of physical parameters, listed in Table 4. In practice, the WF for each pixel is computed by linear interpolation of the WF LUT at the a-priori profile pressure grid and using the auxiliary data sets described in the following sub-sections. Linear interpolations are performed along the cosine of solar and viewing angles, relative azimuth angle and surface albedo, while a nearest neighbor interpolation is performed in surface pressure. In particular, the grid of surface pressure is very thin near the ground, in order to minimize interpolation errors caused by the generally low albedo of ground surfaces. Furthermore, the LUT and model pressures are scaled to the respective surface pressures, in order to avoid extrapolations outside the LUT range.

#### 2.2.3.1 Observation geometry

The LUT covers the full range of values for solar zenith angles, line-of-sight angles and relative azimuth angles that can be encountered in the TROPOMI measurements. The observation geometry is readily present in the L1b data for each satellite pixel.

#### 2.2.3.2 Total ozone column

The measurement sensitivity at 313 nm is dependent on the total ozone absorption. The LUT covers a range of ozone column values from 200 to 500 DU for a set of typical ozone profiles. The total ozone column is directly available from the operational processing of the S5P total ozone column product.

#### 2.2.3.3 Surface albedo

The albedo value is very important for PBL anthropogenic SO<sub>2</sub> but less critical for volcanic SO<sub>2</sub> when it is higher in the atmosphere. For the surface albedo dimension, we use the climatological monthly minimum Lambertian equivalent reflector (minLER) data from Kleipool et al. (2008) at 328 nm for w1 and w2, and 376 nm for w3. This database is based on OMI measurements and has a spatial resolution of 0.5° x 0.5°. [Note that, other surface reflectance databases with improved spatial resolution \(more appropriate for TROPOMI\) will likely become available and these data sets will be considered for next algorithmic versions.](#)

#### 1 2.2.3.4 Clouds

2 The AMF calculations for TROPOMI partly cloudy scenes use the cloud parameters (cloud  
3 fraction  $f_c$ , cloud albedo  $A_c$ , cloud pressure  $ctp$ ) supplied by the nominal S5P cloud algorithm  
4 OCRA/ROCINN in its Clouds as Reflecting Boundaries (CRB) implementation (Loyola et al.,  
5 2016). The cloud surface is considered to be a Lambertian reflecting surface and the  
6 treatment of clouds is achieved through the independent pixel approximation (IPA; Martin et  
7 al., 2002) which considers a inhomogeneous satellite pixel as being composed (as for the  
8 radiance intensity) of two independent homogeneous scenes, one completely clear and the  
9 other completely cloudy. The weighting function is expressed as:

$$m(p) = \Phi m_{\text{cloud}}(p) + (1 - \Phi) m_{\text{clear}}(p) \quad (7)$$

10 where  $\Phi$  is the intensity-weighted cloud fraction or cloud radiance fraction:

$$\Phi = \frac{f_{\text{eff}} I_{\text{cloud}}}{f_{\text{eff}} I_{\text{cloud}} + (1 - f_{\text{eff}}) I_{\text{clear}}} \quad (8)$$

11 The suffixes clear and cloudy refer to the WF and intensity calculation corresponding to a  
12 fully clear or cloudy pixel, respectively. The WF LUT is therefore accompanied by an intensity  
13 LUT with the same input grids. Both LUTs have been generated for a range of cloud cover  
14 fractions and cloud top pressures.

Note that the variations of the cloud albedo are directly related to the cloud optical thickness. Strictly speaking, in a Lambertian (reflective) cloud model approach, only thick clouds can be represented. An effective cloud fraction corresponding to an effective cloud albedo of 0.8 ( $f_{eff} \cong f_c \frac{A_c}{0.8}$ ) can be defined, in order to transform optically thin clouds into equivalent optically thick clouds of reduced extent. Note that in some cases (thick clouds with  $A_c > 0.8$ ) the effective cloud fraction can be larger than one and the algorithm assumes  $f_{eff}=1$ . In such altitude dependent air mass factor calculations, a single cloud top pressure is assumed within a given viewing scene. For low effective cloud fractions ( $f_{eff}$  lower than 10%), the current cloud top pressure output is highly unstable and it is therefore reasonable to consider the observation as a clear-sky pixel (i.e. the cloud fraction is set to 0 in Eq. 8) in order to avoid unnecessary error propagation through the retrievals, which can be as high as 100%. Moreover, it has been shown recently by Wang et al. (2016) using multi-axis DOAS (MAX-DOAS) observations to validate satellite data that in case of elevated aerosol loadings in the PBL (typically leading to apparent  $f_{eff}$  up to 10%), it is recommended to apply clear-sky AMFs rather than total AMFs (based on cloud parameters) that presumably correct implicitly for the aerosol effect on the measurement sensitivity.

It should be noted that the formulation of the pressure dependent air mass factor for a partly cloudy pixel implicitly includes a correction for the SO<sub>2</sub> column lying below the cloud and therefore not seen by the satellite, the so-called ghost column. Indeed, the total AMF calculation as expressed by Eqs. 6 and 7 assumes the same shape factor and implies an integration of the a-priori profile from the top of atmosphere to the ground, for each fraction of the scene. The ghost column information is thus coming from the a-priori profile shapes. For this reason, only observations with moderate cloud fractions ( $f_{eff}$  lower than 30%) are used, unless it can be assumed that the cloud cover is mostly situated below the SO<sub>2</sub> layer, i.e. a typical situation for volcanic plumes injected in the upper-troposphere or lower-stratosphere.

#### 2.2.3.5 Surface height

The surface height ( $z_s$ ) is determined for each pixel by interpolating the values of a high resolution digital elevation map, GMTED2010 (Danielson et al., 2011).

#### 2.2.3.6 Profile shapes

It is generally not possible to know at the time of observation what the SO<sub>2</sub> vertical profile is and whether the observed SO<sub>2</sub> is of volcanic origin or from pollution (or both). Therefore, the algorithm computes four vertical columns for different hypothetical SO<sub>2</sub> profiles.

Three box profiles of 1 km thickness, located in the boundary layer, upper-troposphere and lower-stratosphere, are used. The first box profile stands for typical conditions of well mixed SO<sub>2</sub> (from volcanic or anthropogenic emissions) in the boundary layer while the upper-troposphere and lower stratosphere box profiles are representative of volcanic SO<sub>2</sub> plumes from effusive and explosive eruptions, respectively.

In order to have more realistic SO<sub>2</sub> profiles for polluted scenes, daily forecasts calculated with the global TM5 chemical transport model (Huijnen et al., 2010) will also be used. TM5 will be operated with a spatial resolution of 1°x1° in latitude and longitude, and with 34 sigma pressure levels up to 0.1 hPa in the vertical direction. TM5 will use 3-hourly meteorological fields from the European Centre for Medium Range Weather Forecast (ECMWF) operational model (ERA-Interim reanalysis data for reprocessing, and the operational archive for real time applications and forecasts). These fields include global distributions of wind, temperature, surface pressure, humidity, (liquid and ice) water content, and precipitation. A more detailed description of the TM5 model is given at <http://tm.knmi.nl/> and by van Geffen et al. (2016).

For the calculation of the air mass factors, the profiles are linearly interpolated in space and time, at the pixel centre and S5P local overpass time, through a model time step of 30 minutes. For NRT processing, the daily forecast of the TM5 model (located at KNMI) will be ingested by the UPAS operational processor.

To reduce the errors associated to topography and the lower spatial resolution of the model compared to the TROPOMI 7x3.5 km<sup>2</sup> spatial resolution, the a-priori profiles need to be rescaled to effective surface elevation of the satellite pixel. The TM5 surface pressure is converted by applying the hypsometric equation and the assumption that temperature changes linearly with height (Zhou et al., 2009):

$$p_s = p_{TM5} \left( \frac{T_{TM5}}{(T_{TM5} + \Gamma(z_{TM5} - z_s))} \right)^{-\frac{g}{RT}} \quad (9)$$

where  $p_{TM5}$  and  $T_{TM5}$  are the TM5 surface pressure and temperature,  $\Gamma = 6.5 \text{Kkm}^{-1}$  the lapse rate,  $z_{TM5}$  the TM5 terrain height, and  $z_s$  surface elevation for the satellite ground pixel. The TM5 SO<sub>2</sub> profile is shifted to start at  $p_s$  and scaled so that volume mixing ratios are preserved (see Zhou et al., 2009).

#### 2.2.3.7 Temperature correction

The SO<sub>2</sub> absorption cross-sections of Bogumil et al. (2003) show a clear temperature dependence which has an impact on the retrieved SO<sub>2</sub> SCDs depending on the fitting window used. However, only one temperature (203K) is used for the DOAS fit, therefore a temperature correction needs to be applied:  $\text{SCD}' = C_{\text{temp}} \cdot \text{SCD}$ . While the SO<sub>2</sub> algorithm provides vertical column results for a set of a-priori profiles, applying this correction to the slant column is not simple and as a workaround it is preferred to apply the correction directly to the AMFs (or box-AMFs to be precise) while keeping the (retrieved) SCD unchanged:  $\text{AMF}' = \text{AMF} / C_{\text{temp}}$ . This formulation implicitly assumes that the AMF is not strongly affected by temperature, which is a reasonable approximation (optically thin atmosphere). The correction to be applied requires a temperature profile for each pixel (which is obtained from the TM5 model):

$$C_{\text{temp}} = 1 / [1 - \alpha \cdot (T[\text{K}] - 203)] \quad (10)$$

where  $\alpha$  equals 0.002, 0.0038 and 0, for the fitting windows 312-326 nm, 325-335 nm and 360-390 nm, respectively. The parameter  $\alpha$  has been determined empirically by fitting Eq. 10 through a set of data points (Figure 6), for each fitting window. Each value in Figure 6 is the slope of the fitting line between the SO<sub>2</sub> differential cross-sections at 203K vs the cross-section at a given temperature. In the fitting window 360-390 nm, no temperature correction is applied ( $\alpha=0$ ) because the cross-sections are quite uncertain. Moreover, the 360-390 nm wavelength range is meant for extreme cases (strong volcanic eruptions) for SO<sub>2</sub> plumes in the lower-stratosphere where a temperature of 203K is a good baseline.

#### 2.2.3.8 Aerosols

The presence of aerosol in the observed scene (likely when observing anthropogenic pollution or volcanic events), may affect the quality of the SO<sub>2</sub> retrieval (e.g. Yang et al., 2010). No explicit treatment of aerosols (absorbing or not) is foreseen in the algorithm as there is no general and easy way to treat the aerosols effect on the retrieval. At processing time, the aerosol parameters (e.g., extinction profile or single scattering albedo) are unknown. However, the information on the S5P UV Absorbing Aerosol Index (AAI) by Zweers et al. (2016) will be included in the L2 SO<sub>2</sub> files as it gives information to the users on the presence of aerosols both for anthropogenic and volcanic SO<sub>2</sub>. Nevertheless, the AAI data should be used/interpreted with care. In an offline future version of the SO<sub>2</sub> product, absorbing aerosols might be included in the forward model, if reliable information on absorbing aerosol can be obtained from the AAI and the S5P aerosol height product (Sanders et al., 2016).

### 3. ERROR ANALYSIS

#### 3.1 INTRODUCTION

The total uncertainty (accuracy and precision) on the SO<sub>2</sub> columns produced by the algorithm presented in section 2, is composed of many sources of error (see also e.g., Lee et al., 2009). Several of them are related to the instrument, such as uncertainties due to noise or knowledge of the slit function. These instrumental errors propagate into the uncertainty on the slant column. Other types of error can be considered as model errors and are related to the representation of the physics in the algorithm. Examples of model errors are uncertainties on the trace gas absorption cross-sections and the treatment of clouds. Model errors can affect the slant column results or the air mass factors.

The total retrieval uncertainty on the SO<sub>2</sub> vertical columns can be derived by error propagation, starting from Eq. 1 and if one assumes uncorrelated retrieval steps (Boersma et al., 2004; De Smedt et al., 2008):

$$\sigma_{N_V}^2 = \left(\frac{\sigma_{N_S}}{M}\right)^2 + \left(\frac{\sigma_{N_S^{\text{back}}}}{M}\right)^2 + \left(\frac{(N_S - N_S^{\text{back}})\sigma_M}{M^2}\right)^2 \quad (11)$$

where  $\sigma_{N_S}$  and  $\sigma_{N_S^{\text{back}}}$  are the errors on the slant column  $N_S$  and on the background correction  $N_S^{\text{back}}$ , respectively.

The error analysis is complemented by the total column averaging kernel (AK) as described in Eskes and Boersma (2003):

$$AK(p) = \frac{m'(p)}{M} \quad (12)$$

( $m'$  is the weighting function, Eq. 6) which is often used to characterize the sensitivity of the retrieved column to a change in the true profile.

#### 3.2 ERROR COMPONENTS

The following sections describe and characterize error contributions to the total SO<sub>2</sub> vertical column uncertainty. These different error components and corresponding typical values are summarized in Tables 5 and 6. Note that, at the time of writing, the precise effect of several S5P-specific error sources are unknown and will be estimated during operations.



A difficulty in the error formulation presented above comes from the fact that it assumes the different error sources/steps of the algorithm to be independent and uncorrelated, which is not strictly valid. For example, the background correction is designed to overcome systematic features/deficiencies of the DOAS slant column fitting and these two steps cannot be considered as independent. Hence, summing up all the corresponding error estimates would lead to overestimated error bars. Therefore, several error sources will be discussed in the following sub-sections without giving actual values at this point. Their impact is included and described in later sub-sections.

Another important point to note is that one should also (be able to) discriminate systematic and random components of a given error source V:

$$\sigma_V^2 = \frac{\sigma_{V(rand)}^2}{n} + \sigma_{V(syst)}^2 \quad (13)$$

here  $n$  is the number of pixels considered. However, they are hard to separate in practice. Therefore, each of the 20 error contributions are (tentatively) classified as either “random” or “systematic” errors, depending on their tendencies to average out in space/time or not.

### 3.2.1 Errors on the slant column

Error sources that contribute to the total uncertainty on the slant column originate both from instrument characteristics and uncertainties/limitations on the representation of the physics in the DOAS slant column fitting algorithm. For the systematic errors on the slant column, the numbers provided in Table 5 have been determined based on sensitivity tests (using the QDOAS software).

All effects summed in quadrature, the various contributions are estimated to account for a systematic error of about 20% +0.2DU of the background-corrected slant column ( $\sigma_{N_s, syst} = 0.2 * (N_s - N_s^{back}) + 0.2DU$ ).

For the random component of the slant column errors, the error on the slant columns provided by the DOAS fit is considered (hereafter referred to as SCDE) as it is assumed to be dominated by and representative for the different random sources of error.

*Error source 1: SO<sub>2</sub> cross-section*

Systematic errors on slant columns due to SO<sub>2</sub> cross-sections uncertainties are estimated to be around 6% (Vandaele et al., 2009) in window 1 (312-326 nm) and window 2 (325-335 nm) and unknown in window 3 (360-390 nm). In addition, the effect of the temperature on the SO<sub>2</sub> cross-sections has to be considered as well. We refer to see section 3.2.2 for a discussion of this source of error.

#### *Error source 2: O<sub>3</sub> and SO<sub>2</sub> absorption*

Non-linear effects due to O<sub>3</sub> absorption are to a large extent accounted for using the Taylor expansion of the O<sub>3</sub> optical depth (Pukite et al., 2010). Remaining systematic biases are then removed using the background correction; hence residual systematic features are believed to be small (please read also the discussion on errors 9 and 10). The random component of the slant column error contributes to SCDE.

Non-linear effects due to SO<sub>2</sub> absorption itself (mostly for volcanic plumes) are largely handled by the triple windows retrievals but - as will be discussed in section 4 - the transition between the different fitting windows is a compromise and there are cases where saturation can still lead to rather large uncertainties. However, those are difficult to assess on a pixel to pixel basis.

#### *Error source 3: Other atmospheric absorption/interferences*

In some geographical regions, several systematic features in the slant columns remain after the background correction procedure (see discussion on error 9: background correction error) and are attributed to spectral interferences not fully accounted for in the DOAS analysis, such as incomplete treatment of the Ring effect. This effect has also a random component and contributes to the retrieved SCD error (SCDE).

#### *Error source 4 : Radiance shot noise*

It has a major contribution to the SCDE and it can be estimated from typical S/N values of S5P in UV band 3 (800-1000, according to Veefkind et al., 2012). This translates to typical SCD random errors of about 0.3-0.5, 5 and 60 DU for window 1, 2 and 3, respectively. Note that real measurements are needed to consolidate these numbers.

#### *Error source 5 : DOAS settings*

Tests on the effect of changing the lower and upper limits of the fitting windows by 1 nm and the order of the closure polynomial (4 instead of 5) have been performed. Based on a selection of orbits for the Kasatochi eruption (wide range of measured SCDs), the corresponding SCD errors are less than 11, 6 and 8 % for window 1, 2 and 3, respectively.

#### *Error source 6: Wavelength and radiometric calibration*

Tests on the effect of uncertainties in the wavelength calibration have been performed in the ESA CAMELOT study. The numbers are for a shift of 1/20th of the spectral sampling in the solar spectrum and 1/100th of the spectral sampling in the Earthshine spectrum. The shift can be corrected for, but interpolation errors can still lead to a remaining uncertainty of a few percent.

Regarding radiometric calibration, the retrieval result is in principle insensitive to flat (spectrally constant) offsets on the measured radiance because the algorithm includes an intensity offset correction. From the ESA ONTRAQ study it was found that additive error signals should remain within 2% of the measured spectrum.

#### *Error source 7: Spectral response function*

Uncertainties in the S5P instrumental slit functions can lead to systematic errors on the retrieved SO<sub>2</sub> slant columns (to be determined).

#### *Error source 8: Other spectral features*

Unknown or untreated instrumental characteristics such as stray light and polarization sensitivity can introduce spectral features that may lead to bias in the retrieved slant column data. To certain extend these can be prevented by the DOAS polynomial and the intensity offset correction settings, as long as the perturbing signals are a smooth function of wavelength. Conversely, high-frequency spectral structures can have potentially a large impact on SO<sub>2</sub> retrievals depending on their amplitude and whether they interfere with SO<sub>2</sub> absorption structures. At the time of writing, it is hard to evaluate these measurement errors. Once the instrument will be operating, such measurement errors will be characterized and correct for, either as part of L1b processor or in the form of pseudo absorption cross-sections in the DOAS analysis.

In the ONTRAQ study, testing sinusoidal perturbation signals showed that the effect of spectral features on the retrieval result depends strongly on the frequency of the signal. Additives signals with an amplitude of 0.05 % of the measurement affect the retrieved SO<sub>2</sub> slant column up to 30%. The effect scales more or less linearly with the signal amplitude.

#### *Error source 9: Background/destriping correction*

This error source is mostly systematic and important for anthropogenic SO<sub>2</sub> or for monitoring degassing volcanoes. Based on OMI and GOME-2 test retrievals, the uncertainty on the background correction is estimated to be < 0.2 DU. This value accounts for limitations of the background correction and is compatible with residual slant columns values typically found (after correction) in some clean areas (e.g. above the Sahara), or for a possible contamination by volcanic SO<sub>2</sub>, after a strong eruption.

### **3.2.2 Errors on the air mass factor**

The error estimates on the AMF are listed in Table 6 and are based on simulations and closed-loop tests using the radiative transfer code LIDORT. One can identify two sources of errors on the AMF. First, the adopted LUT approach has limitations in reproducing the radiative transfer in the atmosphere (forward model errors). Secondly, the error on the AMF depends on input parameter uncertainties. This contribution can be broken down into a squared sum of terms (Boersma et al., 2004):

$$\sigma_M^2 = \left( \frac{\partial M}{\partial \text{alb}} \cdot \sigma_{\text{alb}} \right)^2 + \left( \frac{\partial M}{\partial \text{ctp}} \cdot \sigma_{\text{ctp}} \right)^2 + \left( \frac{\partial M}{\partial \text{feff}} \cdot \sigma_{\text{feff}} \right)^2 + \left( \frac{\partial M}{\partial s} \cdot \sigma_s \right)^2 \quad (14)$$

where  $\sigma_{\text{alb}}$ ,  $\sigma_{\text{ctp}}$ ,  $\sigma_{\text{feff}}$ ,  $\sigma_s$  are typical uncertainties on the albedo, cloud top pressure, cloud fraction and profile shape, respectively.

The contribution of each parameter to the total air mass factor error depends on the observation conditions. The air mass factor sensitivities ( $\frac{\partial M}{\partial \text{parameter}}$ ), i.e. the air mass factor derivatives with respect to the different input parameters, can be derived for any particular condition of observation using the altitude-dependent AMF LUT, created with LIDORTv3.3, and using the a-priori profile shapes. In practice, a LUT of AMF sensitivities has been created

using reduced grids from the AMF LUT and a parameterization of the profile shapes based on the profile shape height.

#### *Error source 10: AMF wavelength dependence*

Because of strong atmospheric absorbers (mostly ozone) and scattering processes, the SO<sub>2</sub> AMF shows a wavelength dependence. We have conducted sensitivity tests to determine the optimal wavelengths for AMF calculations representative for each of the three fitting windows. To do so, synthetic radiances and SO<sub>2</sub> SCDs have been generated using LIDORT for typical observations scenarios and at spectral resolution and sampling compatible with S5P. The spectra have been analyzed by DOAS and the retrieved SCDs have been compared to the calculated SCDs at different wavelengths. It comes out of this exercise that 313, 326 and 375 nm provide the best results, for window 1, 2 and 3, respectively. Figure 7 shows an illustration of these sensitivity tests in the baseline window; an excellent correlation and slope close to 1 is found for the scatter plot of retrieved versus simulated slant columns using an effective wavelength of 313 nm for the AMF. Overall, for low solar zenith angles, the deviations from the truth are less than 5% in most cases, except for boundary layer (BL) SO<sub>2</sub> at a 1 DU column level and for low albedo scenes (deviations up to 20%). For high solar zenith angles deviations are less than 10% in most cases, except for BL SO<sub>2</sub> at a 1 DU column level and for low albedo scenes (underestimation up to a factor of 2).

#### *Error source 11: Model atmosphere*

This error relates to uncertainties in the atmospheric profiles used as input of LIDORT for the weighting function look-up-table calculations.

Although the effect of O<sub>3</sub> absorption on the AMF is treated in the algorithm, the O<sub>3</sub> profiles used as input of LIDORT are not fully representative of the real profiles and typical errors (including error due to interpolation) of 5-10% can occur.

A test has been performed by replacing the US standard atmosphere pressure and temperature profiles by high latitude winter profiles and the impact on the results is found to be small.

#### *Error source 12 : Radiative transfer model*

It is believed to be small, less than 5% (Hendrick et al., 2006; Wagner et al., 2007).

1     *Error source 13 : Surface albedo*

2     A typical uncertainty on the albedo is 0.02 (Kleipool et al., 2008). This translates to an error  
3     on the air mass factor after multiplication by the slope of the air mass factor as a function of  
4     the albedo (Eq. 14) and can be evaluated for each satellite pixel. As an illustration, Figure 8  
5     shows the expected dependence of the AMF with albedo and also with the cloud conditions.  
6     From Figure 8a, one concludes that the retrievals of SO<sub>2</sub> in the BL are much more sensitive to  
7     the exact albedo value than for SO<sub>2</sub> higher up in the atmosphere, for this particular example.

8     More substantial errors can be introduced if the real albedo differs considerably from what  
9     is expected, for example in the case of the sudden snowfall or ice cover. The snow/ice cover  
10    flag in the L2 file will therefore be useful for such cases.

11    *Error source 14: Cloud fraction*

12    An uncertainty on the cloud fraction of 0.05 is considered. The corresponding AMF error can  
13    be estimated through Eq.14 (see Figure 8b) or by analytic derivation from Eqs. 6-8.

14    *Error source 15: Cloud top pressure*

15    An uncertainty on the cloud top height of 0.5 km (~50 hPa) is assumed. The corresponding  
16    AMF error can be estimated through Eq. 14. Figure 8c illustrates the typical behaviour of  
17    signal amplification /shielding for a cloud below/ above the SO<sub>2</sub> layer. One can see that the  
18    error (slope) dramatically increases when the cloud is at a height similar to the SO<sub>2</sub> bulk  
19    altitude.

20    *Error source 16 : Cloud correction*

21    Sensitivity tests showed that applying the independent pixel approximation or assuming  
22    cloud-free pixels makes a difference of only 5% on yearly averaged data (for anthropogenic  
23    BL SO<sub>2</sub> VC with cloud fractions less than 40%).

24    *Error source 17: Cloud model*

25    Cloud As Layer (CAL) is the baseline of the S5P cloud algorithm, but a Lambertian Equivalent  
26    Reflector (LER) implementation will be used for NO<sub>2</sub>, SO<sub>2</sub> and HCHO retrievals. The error due  
27    to the choice of the cloud model will be evaluated during the operational phase.

### *Error source 18: Profile shape*

A major source of systematic uncertainty for most SO<sub>2</sub> scenes is the shape of the vertical SO<sub>2</sub> distribution. The corresponding AMF error can be estimated through Eq. 14 and estimation of uncertainty on the profile shape. Note that vertical columns are provided with their averaging kernels, so that column data might be improved for particular locations by using more accurate SO<sub>2</sub> profile shapes based on input from models or observations.

For anthropogenic SO<sub>2</sub> under clear-sky conditions, sensitivity tests using a box profile from 0 to 1±0.5 km above ground level, or using the different profiles from the CAMELOT study (Levelt et al., 2009), give differences in AMFs in the range of 20-35%. Note that for particular conditions SO<sub>2</sub> may also be uplifted above the top of the boundary layer and sometimes reach upper-tropospheric levels (e.g., Clarisse et al., 2011). SO<sub>2</sub> weighting functions displayed in Figure 5 show that the measurement sensitivity is then increased up to factor of 3 and therefore constitutes a major source of error.

In the SO<sub>2</sub> algorithm, the uncertainty on the profile shape is estimated using one parameter describing the shape of the TM5 profile: the profile height, i.e. the altitude (pressure) below which resides 75% of the integrated SO<sub>2</sub> profile.  $\frac{\partial M}{\partial s}$  is approached by  $\frac{\partial M}{\partial s_h}$  where  $s_h$  is half of the profile height. Relatively small variations of this parameter have a strong impact on the total air mass factors for low albedo scenes, because altitude-resolved air mass factors decrease strongly in the lower troposphere, where the SO<sub>2</sub> profiles peak (see e.g. Figure 5).

For volcanic SO<sub>2</sub>, the effect of the profile shape uncertainty depends on the surface or cloud albedo. For low albedo scenes (Fig 5a), if no external information on the SO<sub>2</sub> plume height is available, it is a major source of error at all wavelengths. Vertical columns may vary up to a factor of 5. For high albedo scenes (Fig 5b), the error is less than 50%. It should be noted that these conditions are often encountered for strong eruptions injecting SO<sub>2</sub> well above the cloud deck (high reflectivity). Further uncertainty on the retrieved SO<sub>2</sub> column may arise if the vertical distribution shows distinct layers at different altitudes, due to the different nature of successive phases of the eruption.

1 In the SO<sub>2</sub> algorithm, three 1km thick box profiles are used in the AMF calculations, mostly to  
2 represent typical volcanic SO<sub>2</sub> profiles. The error due to the profile shape uncertainty is  
3 estimated by varying the box center levels by 100 hPa.

#### 4 *Error source 19: Aerosols*

5 The effect of aerosols on the air mass factors are not explicitly considered in the SO<sub>2</sub>  
6 retrieval algorithm. To some extent, however, the effect of the non-absorbing part of the  
7 aerosol extinction is implicitly included in the cloud correction (Boersma et al., 2004).  
8 Indeed, in the presence of aerosols, the cloud detection algorithm is expected to  
9 overestimate the cloud fraction, resulting partly in a compensation effect for cases where  
10 aerosols and clouds are at similar heights. Absorbing aerosols have a different effect on the  
11 air mass factors, and can lead to significant errors for high aerosol optical depths (AODs). In  
12 the TROPOMI SO<sub>2</sub> product, the absorbing aerosol index field can be used to identify  
13 observations with elevated absorbing aerosols.

14 Generally speaking, the effect of aerosols on AMF is highly variable and strongly depends on  
15 aerosols properties (AOD, height and size distribution, single scattering albedo, scattering  
16 phase function, etc.). Typical AMFs uncertainties due to aerosols found in the literature are  
17 given in Table 6. As aerosols affect cloud fraction, cloud top height and to some extent the  
18 albedo database used, correlations between uncertainties on these parameters are to be  
19 expected.

#### 20 *Error source 20: Temperature correction*

21 The DOAS scheme uses an SO<sub>2</sub> cross-section at only one temperature (Bogumil et al., 2003,  
22 at 203K) which is in general not representative of the effective temperature corresponding  
23 to the SO<sub>2</sub> vertical profile. This effect is in principle accounted for by the temperature  
24 correction (which is applied in practice to the AMFs , see section 2.2.3.7) but with a certain  
25 associated error of ~5%.



## 4. VERIFICATION

The SO<sub>2</sub> retrieval algorithm presented in section 2, and hereafter referred as ‘prototype algorithm’, has been applied to OMI and GOME-2 spectra. The results have been extensively verified and validated against different satellite and ground-based data sets (e.g., Theys et al., 2015; Fioletov et al., 2016; Wang et al., 2016). Here we report on further scientific verification activities that took place during the ESA S5P L2WG project.

In addition to the prototype algorithm, a scientific algorithm (referred as ‘verification algorithm’) has been developed in parallel. Both algorithms have been applied to synthetic and real (OMI) spectra and results were compared. In this study, we only present and discuss a selection of results (for OMI).

### 4.1 VERIFICATION ALGORITHM

The S5P TROPOMI Verification Algorithm was developed in close cooperation between the *Max Planck Institute for Chemistry* (MPIC) in Mainz (Germany) and the *Institut für Methodik und Fernerkundung* as part of the *Deutsches Institut für Luft- und Raumfahrt Oberpfaffenhofen* (DLR-IMF). Like the prototype algorithm (PA), the verification algorithm (VA) uses a multiple fitting window DOAS approach to avoid non-linear effects during the SCD retrieval in case of high SO<sub>2</sub> concentrations in volcanic plumes. However, especially the alternatively used fitting windows differ strongly from the ones used for the PA and are entirely located in the lower UV range:

- 312.1-324 nm (*standard retrieval - SR*): Similar to baseline PA fitting window, ideal for small columns
- 318.6-335.1 nm (*medium retrieval - MR*): This fitting window is essentially located in between the first and second fitting window of the PA and was mainly introduced to guarantee a smoother transition between the baseline window and the one used for high SO<sub>2</sub> concentrations. The differential SO<sub>2</sub> spectral features are still about one order of magnitude smaller than in the baseline window.

- 323.1-335.1 nm (*alternative retrieval - AR*): Similar to the intermediate fitting window of the PA. This fitting window is used in case of high SO<sub>2</sub> concentrations. Although it is expected that volcanic events with extreme SO<sub>2</sub> absorption are still affected by non-linear absorption in this window, the wavelength range is sufficient for most volcanic events.

Furthermore, the VA selection criteria for the transition from one window to another are not just based on fixed SO<sub>2</sub> SCD thresholds. The algorithm allows for a slow and smooth transition between different fit ranges by linearly decreasing the weight of the former fitting window and at the same time increasing the weight of the following fitting window:

- 1) for SO<sub>2</sub> SCD ≤ 4x10<sup>17</sup> molec/cm<sup>2</sup> (≈ 15 DU):

$$SO_2 \text{ SCD} = SR$$

- 2) for 4x10<sup>17</sup> molec/cm<sup>2</sup> < SO<sub>2</sub> SCD < 9x10<sup>17</sup> molec/cm<sup>2</sup>:

$$SO_2 \text{ SCD} = SR * \left[ 1 - \frac{SR}{9 \times 10^{17} \text{ molec/cm}^2} \right] + MR * \left[ \frac{SR}{9 \times 10^{17} \text{ molec/cm}^2} \right]$$

- 3) for SO<sub>2</sub> SCD ≥ 9 x 10<sup>17</sup> molec/cm<sup>2</sup> (≈ 33 DU):

$$SO_2 \text{ SCD} = MR$$

- 4) for 9 x 10<sup>17</sup> molec/cm<sup>2</sup> < SO<sub>2</sub> SCD < 4.6 x 10<sup>18</sup> molec/cm<sup>2</sup>:

$$SO_2 \text{ SCD} = MR * \left[ 1 - \frac{MR}{4.6 \times 10^{18} \text{ molec/cm}^2} \right] + AR * \left[ \frac{MR}{4.6 \times 10^{18} \text{ molec/cm}^2} \right]$$

- 5) for SO<sub>2</sub> SCD ≥ 4.6 x 10<sup>18</sup> molec/cm<sup>2</sup> (≈171 DU):

$$SO_2 \text{ SCD} = AR$$

To convert the final SO<sub>2</sub> SCDs into vertical column densities, a single-wavelength AMF for each of the three fitting windows (SO<sub>2</sub> SR, MR and AR) is calculated using the LIDORT LRRS v2.3 (Spurr et al., 2008). The AMF depends on the viewing angles and illumination, surface and cloud conditions as well as on the O<sub>3</sub> total column, which is taken from the O<sub>3</sub> total column retrieval. A cloudy and clear-sky AMF is calculated using temperature dependent cross-sections for SO<sub>2</sub> (Bogumil et al., 2003) and O<sub>3</sub> (Brion et al., 1983):  $AMF(\lambda) = \frac{\ln\left(\frac{I_{+SO_2}}{I_{-SO_2}}\right)}{\tau_{SO_2}}$  with (I<sub>+SO<sub>2</sub></sub>) and (I<sub>-SO<sub>2</sub></sub>) being simulated Earthshine spectra with and without including SO<sub>2</sub> as a trace gas, respectively. Both AMFs are combined using the cloud fraction information. Like the PA, the VA is calculated for different a-priori SO<sub>2</sub> profiles (centre of mass at 2.5 km, 6 km and 15 km) and a temperature correction is applied (see Section 2.2.3.7). In contrast to the PA the VA uses Gaussian-shaped SO<sub>2</sub> profiles with a FWHM of 2.5km rather than box profiles as in the PA. This choice however has only a minor influence on the AMF.

For further details on the VA, the reader is referred to the S5P Science Verification Report (available at: [https://earth.esa.int/web/sentinel/user-guides/sentinel-5p-tropomi/document-library/-/asset\\_publisher/w9Mnd6VPjXlc/content/sentinel-5p-tropomi-science-verification-report](https://earth.esa.int/web/sentinel/user-guides/sentinel-5p-tropomi/document-library/-/asset_publisher/w9Mnd6VPjXlc/content/sentinel-5p-tropomi-science-verification-report)) for more detailed description and results.

## 4.2 VERIFICATION RESULTS

For the inter-comparison, the prototype algorithm and verification algorithm were applied to OMI data for three different SO<sub>2</sub> emission scenarios: moderate volcanic SO<sub>2</sub> VCDs on May 1, 2005, caused by the eruption of the Anatahan volcano, elevated anthropogenic SO<sub>2</sub> VCDs, on May 1, 2005, from the Norilsk copper smelter (Russia), and strongly enhanced SO<sub>2</sub> VCDs, on August 8, 2008, after the massive eruption of Mount Kasatochi.

In the following, both algorithms use the same assumption of an SO<sub>2</sub> plume located at 15 km altitude for the AMF calculation. Even if this choice is not realistic for some of the presented scenarios, it minimizes the influence of differences in the a-priori settings. Main deviations between Prototype and Verification Algorithm are therefore expected to be caused by the usage of different fit windows (determining their sensitivity and fit error) and especially the corresponding transition criteria.

Figure 9 shows the resulting maps of the SO<sub>2</sub> VCD for the VA (upper panels) and PA (lower panels) for the three selected test cases. As can be seen, both algorithms result in similar SO<sub>2</sub> VCDs, however, a closer look reveals some differences, such as the maximum VCDs which are not necessarily appearing at the same locations. For the Anatahan case for instance, the maximum VCD is seen closer to the volcano at the eastern end of the plume for the PA, while it appears to be further downwind for the VA. This effect can be explained by the corresponding fit windows used for both algorithms which may result in deviating SO<sub>2</sub> VCDs, especially for SO<sub>2</sub> scenarios where the best choice is difficult to assess. This is illustrated in Figure 10 showing scatter plots of VA versus PA SO<sub>2</sub> VCDs for the three test cases (Anatahan, Norilsk and Kasatochi) color-coded differently depending on the fitting window used for VA (left) and PA (right), respectively. While the PA uses strictly separated results from the individual fit windows, the VA allows a smooth transition whenever resulting SO<sub>2</sub> SCDs are found to be located in between subsequent fit ranges.

For all three test cases, it appears that the PA is less affected by data scattering for low SO<sub>2</sub> or SO<sub>2</sub> free measurements than the VA. For the shortest UV fit windows, both algorithms mainly agree but VA VCDs tend to be higher by 10-15% than the PA VCDs for the Anatahan and Kasatochi measurements but interestingly not for the Norilsk case. For SO<sub>2</sub> VCDs around 7 DU the PA seem to be slightly affected by saturation effects in 312-326 nm window while VA already makes use of a combined SR/MR SCD. For larger SO<sub>2</sub> VCDs (> 10 DU), data sets from both algorithms show an increased scattering, essentially resulting from the more intensive use of fitting windows at longer wavelengths (for which the SO<sub>2</sub> absorption is weaker). While it is difficult to conclude which algorithm is closer to the actual SO<sub>2</sub> VCDs, the combined fit windows of the VA probably are better suited (in some SO<sub>2</sub> column ranges) for such scenarios as the SO<sub>2</sub> cross-section is generally stronger for lower wavelength (< 325 nm) when compared to the intermediate fit window of the PA.

For extremely high SO<sub>2</sub> loadings, i.e. for the Kasatochi plume on August 8, 2008, the DOAS retrievals from PA and VA require all three fit windows to prevent systematic underestimation of the resulting SO<sub>2</sub> SCDs due to non-linear absorption caused by very high SO<sub>2</sub> concentrations within the volcanic plume. Figure 9 (right panel) shows that the SO<sub>2</sub> distribution is similar for both algorithms, including the location of the maximum SO<sub>2</sub> VCD.

From Figure 10 (lowest panel), it can be seen that the VA shows higher values for SO<sub>2</sub> VCDs <100 DU, for all three fit windows. For very high SO<sub>2</sub> VCDs, it seems that the Verification Algorithm is already slightly affected by an underestimation of the SO<sub>2</sub> VCD caused by non-linear radiative transfer effects in the SO<sub>2</sub> AR fit window, while the PA retrievals in the 360-390 nm fit range are insensitive to saturation effects. We note, however, that the Kasatochi plume contained also significant amounts of volcanic ash and we cannot rule out a possible retrieval effect of volcanic ash on the observed differences between PA and VA SO<sub>2</sub> results. Finally we have also investigated other cases with extreme concentrations of SO<sub>2</sub>, and contrasting results were found compared to the Kasatochi case. E.g., on September 4, 2014, PA retrieved up to 260 DU of SO<sub>2</sub> during the Icelandic Bardarbunga fissure eruption while VA only found 150 DU (not shown). Compared to Kasatochi, we note that this specific scenario is very different as for the plume height (the SO<sub>2</sub> plume was typically in the lowermost troposphere ~ 3km a.s.l.) and it is likely to play a role in the discrepancy between PA and VA results.

In summary, we found that the largest differences between prototype and verification algorithms are due to the fitting window transitions and differences of measurement sensitivity of the fitting windows used (all subject differently to non-linear effects). Verification results have shown that the prototype algorithm produces reasonable results for all the expected scenarios, from modest to extreme SO<sub>2</sub> columns, and are therefore adequate for treating the TROPOMI data. In a future processor update, the method could however be refined.

## **5. VALIDATION OF TROPOMI SO<sub>2</sub> PRODUCT**

In this section, we give a brief summary of possibilities (and limitations) to validate the TROPOMI SO<sub>2</sub> product with independent measurements.

Generally speaking, the validation of a satellite SO<sub>2</sub> column product is a challenge for several reasons, on top of which is the representativeness of the correlative data when compared to the satellite retrievals. Another reason comes from the wide range of SO<sub>2</sub> columns in the atmosphere that vary from about 1DU level for anthropogenic SO<sub>2</sub> and low level volcanic degassing to 10-1000 DU for medium to extreme volcanic explosive eruptions.

1 The space-borne measurement of anthropogenic SO<sub>2</sub> is difficult because of the low column  
2 amount and reduced measurement sensitivity close to the surface. The SO<sub>2</sub> signal is covered  
3 by the competing O<sub>3</sub> absorption and the column accuracy is directly affected by the quality  
4 of the background correction applied. Among the many parameters of the SO<sub>2</sub> retrieval  
5 algorithm that affect the results, the SO<sub>2</sub> vertical profile shape is of utmost importance for  
6 any comparison with correlative data. The SO<sub>2</sub> column product accuracy is also directly  
7 impacted by the surface albedo used as input for the AMF calculation, the cloud  
8 correction/filtering and aerosols. In principle, all these effects will have to be addressed in  
9 future validation efforts.

10 The measurement of volcanic SO<sub>2</sub> is facilitated by SO<sub>2</sub> columns often larger than for  
11 anthropogenic SO<sub>2</sub>. However, the total SO<sub>2</sub> column is strongly dependent on the height of  
12 the SO<sub>2</sub> plume which is highly variable and usually unknown. For most volcanoes, there is no  
13 ground-based equipment to measure SO<sub>2</sub> during an appreciable eruption and even if it is the  
14 case, the data are generally difficult to use for validation. For strong eruptions, volcanic  
15 plumes are transported over long-distances and can be measured by ground-based and  
16 aircraft devices but generally there is only a handful of datasets available and the number of  
17 coincidences is rather small.

18 For both anthropogenic and volcanic SO<sub>2</sub> measurements, the vertical distribution of SO<sub>2</sub> is a  
19 key parameter limiting the product accuracy. If reliable (external) information on the SO<sub>2</sub>  
20 profile (or profile shape) is available, it is recommended to recalculate the SO<sub>2</sub> vertical  
21 columns by using this piece of information and the column averaging kernels that can be  
22 found in the TROPOMI SO<sub>2</sub> L2 files.

## 23 **5.1 GROUND-BASED MEASUREMENTS**

24 When considering the application of ground-based instruments for the validation of satellite  
25 SO<sub>2</sub> observations, several types of instruments are to be considered.

1 Brewer instruments have the advantage to operate as part of a network  
2 (<http://www.woudc.org>), but the retrieved SO<sub>2</sub> columns are generally found inaccurate for  
3 the validation of anthropogenic SO<sub>2</sub>. Yet in some cases they might be used for coincidences  
4 with volcanic clouds, typically for SO<sub>2</sub> VCDs larger than 5-10 DU.  
5 Multi-axis DOAS (MAX-DOAS) or direct-sun DOAS measurements (e.g., from Pandora  
6 instruments) can be used to validate satellite SO<sub>2</sub> columns from anthropogenic emissions  
7 (e.g., Theys et al., 2015; Jin et al., 2016; Wang et al., 2016), but cautiousness must be exerted  
8 in the interpretation of the results because realistic SO<sub>2</sub> profile shapes must be used by the  
9 satellite retrieval scheme. While direct-sun DOAS retrievals are independent of the SO<sub>2</sub>  
10 profile shape, MAX-DOAS observations carry information on the SO<sub>2</sub> vertical distribution but  
11 it is not obvious that the technique is directly applicable to the validation of satellite SO<sub>2</sub>  
12 retrievals, because the technique is not able to retrieve the full SO<sub>2</sub> profile. Another  
13 important limitation comes from the fact that ground-based DOAS and satellite instruments  
14 have very different fields of view and are therefore probing different air masses. This can  
15 cause large discrepancy between ground-based and satellite measurements in case of strong  
16 horizontal gradients of the SO<sub>2</sub> column field.  
17 DOAS instruments scanning through volcanic plumes are now routinely measuring volcanic  
18 SO<sub>2</sub> emissions, as part of the Network for Observation of Volcanic and Atmospheric Change  
19 (NOVAC; Galle et al., 2010), for an increasing number of degassing volcanoes. Ongoing  
20 research focusses on calculating SO<sub>2</sub> fluxes from those measurements and accounting for  
21 non-trivial radiative transfer effects (e.g. light dilution, see Kern et al., 2009). NOVAC flux  
22 data could be used for comparison with TROPOMI SO<sub>2</sub> data but it requires techniques to  
23 convert satellite SO<sub>2</sub> vertical column into mass fluxes (see e.g., Theys et al., 2013, and  
24 references therein, Beirle et al., 2014). Similarly, fast-sampling UV cameras are becoming  
25 increasingly used to measure and invert SO<sub>2</sub> fluxes and are also relevant to validate  
26 TROPOMI SO<sub>2</sub> data over volcanoes or anthropogenic point sources (e.g., power plants). It  
27 should be noted, however, that ground-based remote-sensing instruments operating nearby  
28 SO<sub>2</sub> point sources are sensitive to newly emitted SO<sub>2</sub> plumes while a satellite sensor like  
29 TROPOMI will measure aged plumes that have been significantly depleted in SO<sub>2</sub>. While in  
30 some cases it is possible to compensate for this effect by estimating the SO<sub>2</sub> lifetime e.g.  
31 directly from the space measurements (Beirle et al., 2014), the general situation is that the

SO<sub>2</sub> loss rate is highly variable (especially in volcanic environments) and this can lead to strong discrepancies when comparing satellite and ground-based SO<sub>2</sub> fluxes.

In addition to optical devices, there are also in-situ instruments measuring surface SO<sub>2</sub> mixing ratios. This type of instrument can only validate surface concentrations, and additional information on the SO<sub>2</sub> vertical profile (e.g., from model data) is required to make the link with the satellite retrieved column. However, in-situ instruments are being operated for pollution monitoring in populated areas, and allow for extended and long term comparisons with satellite data (see e.g. Nowlan et al., 2011).

## **5.2 AIRCRAFT AND MOBILE MEASUREMENTS**

Airborne and mobile instruments provide valuable and complementary data for satellite validation.

In case of volcanic explosive eruptions, satisfactory validation results can be obtained by comparing satellite and fixed ground DOAS measurements of drifting SO<sub>2</sub> plumes, as shown by Spinei et al. (2008), but the comparison generally suffers from the small number of coincidences. Dedicated aircraft campaign flights (e.g. Schumann et al., 2011) can in principle improve the situation. Their trajectory can be planned with relative ease to cross sustained eruptive plumes. However, localized high SO<sub>2</sub> concentrations, may be carried away too quickly to be captured by aircraft or have diluted below the threshold limit for satellite detection before an aircraft can respond. An important data base of SO<sub>2</sub> aircraft measurements is provided by the CARIBIC/IAGOS project which exploits automated scientific instruments operating long distance commercial flights. Measurements of volcanic SO<sub>2</sub> during the eruptions of Mt. Kasatochi and Eyjafjallajökull and comparison with satellite data have been reported by Heue et al. (2010, 2011).



1 An attempt to validate satellite SO<sub>2</sub> measurements using mobile DOAS instrument for a fast  
2 moving (stratospheric) volcanic SO<sub>2</sub> plume was presented by Carn and Lopez (2011).  
3 Although the agreement between both data sets was found reasonable, the comparison was  
4 complicated by the relatively fast displacement of the volcanic cloud with respect to the  
5 ground spectrometer and clear heterogeneity on scales smaller than a satellite pixel. For  
6 degassing volcanoes or new fissure eruptions, mobile DOAS traverse measurements under  
7 the plume offer unique opportunities to derive volcanic SO<sub>2</sub> fluxes that could be used to  
8 validate satellite measurements.

9 For polluted regions, measurements of anthropogenic SO<sub>2</sub> by airborne nadir-looking DOAS  
10 sensors are able to produce high spatial resolution mapping of the SO<sub>2</sub> column field (e.g.,  
11 during the AROMAT campaigns, <http://uv-vis.aeronomie.be/aromat/>) that could be used to  
12 validate TROPOMI SO<sub>2</sub> product or give information on horizontal gradients of the SO<sub>2</sub> field  
13 (e.g. in combination with coincident mobile DOAS measurements) that would be particularly  
14 useful when comparing satellite and MAX-DOAS data (see discussion in section 5.1). Equally  
15 important are also limb-DOAS or in-situ instruments to provide information on vertical  
16 distribution of SO<sub>2</sub> which is crucial for satellite validation (e.g., Krotkov et al., 2008).

### 17 5.3 SATELLITE MEASUREMENTS

18 Inter-comparison of satellite SO<sub>2</sub> measurements generally provides a convenient and easy  
19 way to evaluate at a glance the quality of a satellite product, by comparing SO<sub>2</sub> maps for  
20 instance. Often, it also provides improved statistics and geographical representativeness but  
21 it poses a number of problems because when different satellite sensors are compared they  
22 have also different overpass times, swaths, spatial resolutions and measurement sensitivities  
23 to SO<sub>2</sub>.

For volcanic SO<sub>2</sub>, satellite measurements often provide the only data available for the first hours to days after an eruption event and satellite inter-comparison is thus the only practical way to assess the quality of the retrievals. To overcome sampling issues mentioned above, inter-comparison of SO<sub>2</sub> masses integrated over the measured volcanic plume is often performed. For TROPOMI, current satellite instruments will be an important source of data for cross-comparisons. Although non-exhaustive, the list of satellite sensors that could be used is: OMI, OMPS, GOME-2 and IASI (MetOp-A, -B, and the forthcoming -C), AIRS, CrIS, VIIRS and MODIS. As mentioned above, the inter-comparison of satellite SO<sub>2</sub> products is difficult and in this respect the plume altitude is a key-factor of the satellite SO<sub>2</sub> data accuracy. Comparison of TROPOMI and other satellite SO<sub>2</sub> products will benefit from the advent of scientific algorithms for the retrieval of SO<sub>2</sub> plume heights but also from the use of volcanic plume height observations using space lidar instruments (e.g. CALIOP and the future EarthCare mission).

For both anthropogenic SO<sub>2</sub> and volcanic degassing SO<sub>2</sub>, the satellite UV sensors OMI, GOME-2 and OMPS can be compared to TROPOMI SO<sub>2</sub> data by averaging data over certain polluted regions. It will give valuable information on the data quality but, in some cases, the comparison will suffer from differences in spatial resolution. A more robust and in-depth comparison would be to use different TROPOMI SO<sub>2</sub> datasets generated by different retrieval algorithms and investigate the differences in the various retrieval steps (spectral fitting, corrections, radiative transfer simulations, error analysis).

## 6 CONCLUSIONS

Based on the heritage from GOME, SCIAMACHY, GOME-2 and OMI, a DOAS retrieval algorithm has been developed for the operational retrieval of SO<sub>2</sub> vertical columns from TROPOMI Level1b measurements in the UV spectral range. Here we describe its main features.

In addition to the traditionally used fitting window of 312-326 nm, the new algorithm allows for the selection of two additional fitting windows (325-335 nm and 360-390nm), reducing the risk of saturation and ensuring accurate SO<sub>2</sub> column retrieval even for extreme SO<sub>2</sub>

1 concentrations as observed for major volcanic events. The spectral fitting procedure also  
2 includes an advanced wavelength calibration scheme and a spectral spike removal algorithm.

3 After the slant column retrieval, the next step is a background correction, which is  
4 empirically based on the O<sub>3</sub> slant column (for the baseline fitting window) and across-track  
5 position, and accounts for possible across-track dependencies and instrumental degradation.

6 The SO<sub>2</sub> slant columns are then converted into vertical columns by the means of air mass  
7 factor calculations. The latter is based on weighting function look-up-tables with  
8 dependencies on the viewing geometry, clouds, surface pressure, albedo, ozone, and is  
9 applied to pre-defined box profiles and TM5 CTM forecast profiles. In addition, the algorithm  
10 computes DOAS-type averaging kernels and a full error analysis of the retrieved columns.

11 In this paper we have also presented verification results using an independent algorithm for  
12 selected OMI scenes with enhanced SO<sub>2</sub> columns. Overall the prototype algorithm agrees  
13 well with the verification algorithm, demonstrating its ability in retrieving accurately medium  
14 to very high SO<sub>2</sub> columns. We have discussed the advantages and limitations of both  
15 prototype and verification algorithms.

16 Based on the experience with GOME-2 and OMI, the TROPOMI SO<sub>2</sub> algorithm is expected to  
17 have a comparable level of accuracy. Due to its high signal-to-noise ratio, TROPOMI will be  
18 capable of at least achieving comparable retrieval precision as its predecessors but at a  
19 much finer spatial resolution of 7x3.5 km<sup>2</sup> at best. For single measurements, the user  
20 requirements for tropospheric SO<sub>2</sub> concentrations will not be met, but improved monitoring  
21 of strong pollution and volcanic events will be possible by spatial and temporal averaging the  
22 increased number of observations of TROPOMI. Nevertheless, it will require significant  
23 validation work and here we have discussed some of the inherent challenges for both  
24 volcanic and anthropogenic SO<sub>2</sub> retrievals. Correlative measurements from ground-based,  
25 aircraft/mobile, and satellite instruments, will be needed over different regions and various  
26 emission scenarios to assess and characterize the quality of TROPOMI SO<sub>2</sub> retrievals.

The baseline algorithm presented here, including all its modules (slant column retrieval, background correction, air mass factor calculation and error analysis), has been fully implemented in the S5P operational processor UPAS by the DLR team. Figure 11 illustrates the status of the implementation for one day of OMI test data, exemplarily for the slant columns retrievals. A nearly perfect agreement is found between SCD results over 4 orders of magnitude. A similar match between prototype algorithm and operational processor is found for all other retrieval modules.

For more information on the TROPOMI SO<sub>2</sub> L2 data files, the reader is referred to the S5P SO<sub>2</sub> Product User Manual (Pedergrana et al., 2016).

## **APPENDIX A. FEASIBILITY, INFORMATION ON DATA PRODUCT AND ANCILLARY DATA**

### **High level data product description**

In addition to the main product results, such as SO<sub>2</sub> slant column, vertical column and air mass factor, the level 2 data files will contain several additional parameters and diagnostic information. Table A1 gives a minimum set of data fields that will be present in the Level 2 data. A 1-orbit SO<sub>2</sub> column Level 2 file will be of about 640 MB. More details about the operational level 2 product based on the netCDF data format and the CF metadata convention are provided in the SO<sub>2</sub> Product User Model (Pedergrana et al., 2016).

It should be noted that the averaging kernels are given only for the a-priori profiles from the TM5 CTM (to save space). The averaging kernels for the box profiles can be estimated by scaling the provided averaging kernel (corresponding to TM5 profiles):  $AK_{\text{box}}(p) = AK(p) \cdot \text{Scaling box}$ . Following the AK formulation of Eskes and Boersma (2004), the scaling factor is given simply by AMFs ratios:  $AMF_{\text{TM5}}/AMF_{\text{box}}$ .

### **Auxiliary information**

The algorithm relies on several external data sets. These can be either static or dynamic. An overview is given in Table A2 and A3.

## **ACKNOWLEDGEMENTS**

This work has been performed in the frame of the TROPOMI project. We acknowledge financial support from ESA S5P, Belgium Prodex TRACE-S5P projects, and Bayerisches

Staatsministerium für Wirtschaft und Medien, Energie und Technologie (grant 07 03/893 73/5 /2013).

#### REFERENCES

Afe, O. T., Richter, A., Sierk, B., Wittrock, F., and Burrows, J.P.: BrO emissions from volcanoes: a survey using GOME and SCIAMACHY measurements, *Geophys. Res. Lett.*, 31, L24113, 2004.

Beirle, S., Hörmann, C., Penning de Vries, M., Dörner, S., Kern, C., and Wagner, T.: Estimating the volcanic emission rate and atmospheric lifetime of SO<sub>2</sub> from space: a case study for Kīlauea volcano, Hawaii, *Atmos. Chem. Phys.*, 14, 8309-8322, doi:10.5194/acp-14-8309-2014, 2014.

Bobrowski, N., Kern, C., Platt, U., Hörmann, C., and Wagner, T.: Novel SO<sub>2</sub> spectral evaluation scheme using the 360–390 nm wavelength range, *Atmos. Meas. Tech.*, 3, 879-891, doi:10.5194/amt-3-879-2010, 2010.

Boersma, K. F., Eskes, H. J., and Brinksma, E. J.: Error analysis for tropospheric NO<sub>2</sub> retrieval from space, *J. Geophys. Res.*, 109, D04311, doi: 10.1029/2003JD003962, 2004.

Bogumil, K., Orphal, J., Homann, T., Voigt, S., Spietz, P., Fleischmann, O., Vogel, A., Hartmann, M., Bovensmann, H., Frerick, J., and Burrows, J.P.: Measurements of molecular absorption spectra with the SCIAMACHY Pre-Flight Model: instrument characterization and reference data for atmospheric remote-sensing in the 230-2380 nm region, *Journal of Photochemistry and Photobiology A*, 157, 167-184, 2003.

1 Bovensmann, H., Peuch, V.-H., van Weele, M., Erbertseder, T., and Veihelmann, B.: Report Of  
2 The Review Of User Requirements For Sentinels-4/-5, ESA, EOP-SM/2281/BV-bv, issue: 2.1,  
3 2011.

4  
5 Brenot, H., Theys, N., Clarisse, L., van Geffen, J., van Gent, J., Van Roozendaal, M.,  
6 van der A, R., Hurtmans, D., Coheur, P.-F., Clerbaux, C., Valks, P., Hedelt, P., Prata, F.,  
7 Rasson, O., Sievers, K., and Zehner, C.: Support to Aviation Control Service (SACS): an online  
8 service for near real-time satellite monitoring of volcanic plumes, *Nat. Hazards Earth Syst.*  
9 *Sci.*, 14, 1099-1123, doi:10.5194/nhess-14-1099-2014, 2014.

10  
11 Brion, J., Chakir, A., Charbonnier, J., et al.: Absorption spectra measurements for the ozone  
12 molecule in the 350-830 nm region, *J. Atmos. Chem.*, 30, 291-299,  
13 doi:10.1023/A:1006036924364, 1998.

14  
15 Carn, S.A., and Lopez, T.M.: Opportunistic validation of sulfur dioxide in the Sarychev peak  
16 volcanic eruption cloud, *Atmos. Meas. Tech.*, 4, 1705-1712, 2011.

17 Carn, S.A., Clarisse, L., and Prata, A.J.: Multi-decadal satellite measurements of global  
18 volcanic degassing, *J. Volcanol. Geotherm. Res.*, 311, 99-134,  
19 <http://dx.doi.org/10.1016/j.jvolgeores.2016.01.002>, 2016.

20  
21 Chance, K., and Spurr, R. J.: Ring effect studies: Rayleigh scattering including molecular  
22 parameters for rotational Raman scattering, and the Fraunhofer spectrum, *Applied Optics*,  
23 36, 5224-5230, 1997.

24  
25 Chance, K., and Kurucz, R. L.: An improved high-resolution solar reference spectrum for  
26 earth's atmosphere measurements in the ultraviolet, visible, and near infrared, *J. Quant.*  
27 *Spectrosc. Radiat. Transf.*, 111(9), 1289-1295, 2010.

Clarisse, L., Fromm, M., Ngadi, Y., Emmons, L., Clerbaux, C., Hurtmans, D., and Coheur, P.-F.: Intercontinental transport of anthropogenic sulfur dioxide and other pollutants; an infrared remote sensing case study, *Geophys. Res. Lett.*, 38, L19806, doi:10.1029/2011GL048976, 2011.

Danielson, J.J., and Gesch, D.B.: Global multi-resolution terrain elevation data 2010 (GMTED2010): U.S. Geological Survey Open-File Report 2011–1073, 26 p, 2011.

De Smedt, I., Müller, J.-F., Stavrou, T., van der A, R., Eskes, H., and Van Roozendael, M.: Twelve years of global observation of formaldehyde in the troposphere using GOME and SCIAMACHY sensors, *Atmos. Chem. Phys.*, 8, 4947–4963, 2008.

De Smedt, I., et al.: Formaldehyde retrievals from TROPOMI onboard Sentinel-5 Precursor: Algorithm Theoretical Basis, in preparation for *Atmos. Meas. Tech.*, 2016.

Eisinger, M., and Burrows, J.P.: Tropospheric sulfur dioxide observed by the ERS-2 GOME instrument, *Geophys. Res. Lett.*, Vol. 25, pp. 4177–4180, 1998.

Eskes, H. J., and Boersma, K. F.: Averaging kernels for DOAS total column satellite retrievals, *Atmos. Chem. Phys.*, 3, 1285–1291, 2003.

Fioletov, V. E., McLinden, C. A., Krotkov, N., Yang, K., Loyola, D. G., Valks, P., Theys, N., Van Roozendael, M., Nowlan, C. R., Chance, K., Liu, X., Lee, C., and Martin, R. V.: Application of OMI, SCIAMACHY, and GOME-2 satellite SO<sub>2</sub> retrievals for

1 detection of large emission sources, *J. Geophys. Res. Atmos.*, 118, 11,399–11,418,  
2 doi:10.1002/jgrd.50826, 2013.

3  
4 Fioletov, V.E., McLinden, C.A., Krotkov, N.A., Li, C., Joiner, J., Theys, N., Carn, S.A., and  
5 Moran, M.D.: A global catalogue of large SO<sub>2</sub> sources and emissions derived from the Ozone  
6 Monitoring Instrument, *Atmos. Chem. Phys. Discuss.*, doi:10.5194/acp-2016-417, 2016.

7  
8 Galle, B., Johansson, M., Rivera, C., Zhang, Y., Kihlman, M., Kern, C., Lehmann, T., Platt, U.,  
9 Arellano, S., and Hidalgo, S.: Network for Observation of Volcanic and Atmospheric Change  
10 (NOVAC) – A global network for volcanic gas monitoring: Network layout and instrument  
11 description, *J. Geophys. Res.*, 115, D05304, doi:10.1029/2009JD011823, 2010.

12 He, H., Vinnikov, K. Y., Li, C., Krotkov, N. A., Jongeward, A. R., Li, Z., Stehr, J. W., Hains, J. C.  
13 and Dickerson, R. R.: Response of SO<sub>2</sub> and particulate air pollution to local and regional  
14 emission controls: A case study in Maryland. *Earth's Future*, 4: 94–109.  
15 doi:10.1002/2015EF000330, 2016.

16  
17 Heue K.-P., Brenninkmeijer, C.A.M., Wagner, T., Mies, K., Dix, B., Frieß, U., Martinsson, B. G.,  
18 Šlemr, F., and van Velthoven, P.F.J.: Observations of the 2008 Kasatochi volcanic SO<sub>2</sub> plume  
19 by CARIBIC aircraft DOAS and the GOME-2 satellite. *Atmos. Chem. Phys.*, 10, 4699-4713,  
20 doi:10.5194/acp-10-4699-2010, 2010.

21  
22 Heue, K., Brenninkmeijer, C. A. M., Baker, A. K., Rauthe-Schöch, A., Walter, D., Wagner, T.,  
23 Hörmann, C., Sihler, H., Dix, B., Frieß, U., Platt, U., Martinsson, B. G., van Velthoven, P. F. J.,  
24 Zahn, A., and Ebinghaus, R.: SO<sub>2</sub> and BrO observation in the plume of the Eyjafjallajökull  
25 volcano 2010: CARIBIC and GOME-2 retrievals, *Atmos. Chem. Phys.*, 11, 2973–2989,  
26 doi:10.5194/acp-11-2973-2011, 2011.



Hendrick, F., Van Roozendaal, M., Kylling, A., Petritoli, A., Rozanov, A., Sanghavi, S., Schofield, R., von Friedeburg, C., Wagner, T., Wittrock, F., Fonteyn, D., and De Mazière, M.: Intercomparison exercise between different radiative transfer models used for the interpretation of ground-based zenith-sky and multi-axis DOAS observations, *Atmos. Chem. Phys.*, 6, 93-108, 2006.

Hermans, C., Vandaele, A.C., and Fally, S.: Fourier transform measurements of SO<sub>2</sub> absorption cross sections: I. Temperature dependence in the 24 000–29 000 cm<sup>-1</sup> (345–420 nm) region, *J. Quant Spectrosc. Radiat. Transfer*, 110, 756–765, doi:10.1016/j.jqsrt.2009.10.031, 2009.

Hörmann, C., Sihler, H., Bobrowski, N., Beirle, S., Penning de Vries, M., Platt, U., and Wagner, T.: Systematic investigation of bromine monoxide in volcanic plumes from space by using the GOME-2 instrument, *Atmos. Chem. Phys.*, 13, 4749-4781, doi:10.5194/acp-13-4749-2013, 2013

Huijnen, V., Williams, J., van Weele, M., van Noije, T., Krol, M., Dentener, F., Segers, A., Houweling, S., Peters, W., de Laat, J., Boersma, F., Bergamaschi, P., van Velthoven, P., Le Sager, P., Eskes, H., Alkemade, F., Scheele, R., Nédélec, P., and Pätz, H.-W.: The global chemistry transport model tm5: description and evaluation of the tropospheric chemistry version 3.0., *Geoscientific Model Development*, 3(2):445-473, 2010.

Jin, J., Ma, J., Lin, W., Zhao, H., Shaiganfar, R., Beirle, S., and Wagner, T.: MAX-DOAS measurements and satellite validation of tropospheric NO<sub>2</sub> and SO<sub>2</sub> vertical column densities at a rural site of North China, *Atmospheric Environment*, 133, 12–25, 2016.

1 Kelder, H., van Weele, M., Goede, A., Kerridge, B., Reburn, J., Bovensmann, H., Monks, P.,  
2 Remedios, J., Mager, R., Sassier, H., and Baillon, Y.: Operational Atmospheric Chemistry  
3 Monitoring Missions – CAPACITY: Composition of the Atmosphere: Progress to Applications  
4 in the user Community, Final Report of ESA contract no. 17237/03/NL/GS, 2005.

5 Kern, C., Deutschmann, T., Vogel, A., Wöhrbach, M., Wagner, T., and Platt, U.: Radiative  
6 transfer corrections for accurate spectroscopic measurements of volcanic gas emissions,  
7 Bull. Volcanol., 72,233-247, 2009.

8  
9 Khokhar, M. F., Frankenberg, C., Van Roozendaal, M., Beirle, S., Kühl, S., Richter, A., Platt, U.,  
10 and Wagner, T.: Satellite Observations of Atmospheric SO<sub>2</sub> from Volcanic Eruptions during  
11 the Time Period of 1996 to 2002, J. Adv. Space Res., 36(5), 879-887,  
12 10.1016/j.asr.2005.04.114, 2005.

13  
14 Kleipool, Q. L., Dobber, M. R., de Haan, J. F. and Levelt, P. F.: Earth surface reflectance  
15 climatology from 3 years of OMI data, J. Geophys. Res., 113(D18), D18308,  
16 doi:10.1029/2008JD010290, 2008.

17  
18 Koelemeijer, R. B. A., Stammes, P., Hovenier, J. W. and de Haan, J. F.: A fast method for  
19 retrieval of cloud parameters using oxygen A band measurements from the Global Ozone  
20 Monitoring Experiment, J. Geophys. Res., 106(D4), 3475-3490, doi:10.1029/2000JD900657  
21 2001.

22  
23 Koelemeijer, R.B.A., de Haan, J.F. and Stammes, P.: A database of spectral surface  
24 reflectivity in the range 335-772 nm derived from 5.5 years of GOME observations, J.  
25 Geophys. Res., 108(D2), 4070, doi: 10.1029/2002JD002429, 2003.

1 Krotkov, N. A., Carn, S. A., Krueger, A. J., Bhartia, P. K., Yang, K.: Band residual difference  
2 algorithm for retrieval of SO<sub>2</sub> from the Aura Ozone Monitoring Instrument (OMI), IEEE Trans.  
3 Geosci. Remote Sensing, AURA Special Issue, 44(5), 1259-1266,  
4 doi:10.1109/TGRS.2005.861932, 2006.

5  
6 Krotkov, N. A., et al., Validation of SO<sub>2</sub> retrievals from the Ozone Monitoring Instrument over  
7 NE China, J. Geophys. Res., 113, D16S40, doi:10.1029/2007JD008818, 2008.

8  
9 Krotkov, N. A., McLinden, C. A., Li, C., Lamsal, L. N., Celarier, E. A., Marchenko, S. V., Swartz,  
10 W. H., Bucsela, E. J., Joiner, J., Duncan, B. N., Boersma, K. F., Veefkind, J. P., Levelt, P. F.,  
11 Fioletov, V. E., Dickerson, R. R., He, H., Lu, Z., and Streets, D. G.: Aura OMI observations of  
12 regional SO<sub>2</sub> and NO<sub>2</sub> pollution changes from 2005 to 2014, Atmos. Chem. and Phys., 16(7),  
13 4605-4629, doi:10.5194/acp-15-4605-2016, 2016.

14  
15 Krueger A.J.: Sighting of El Chichon sulfur dioxide clouds with the Nimbus 7 total ozone  
16 mapping spectrometer, Science, 220, 1377–1379, 1983.

17  
18 Li, C., Joiner, J., Krotkov, N. A., and Bhartia, P. K.: A fast and sensitive new satellite SO<sub>2</sub>  
19 retrieval algorithm based on principal component analysis: Application to the ozone  
20 monitoring instrument, Geophys. Res. Lett., 40, 6314–6318, doi:10.1002/2013GL058134,  
21 2013.

22  
23 Langen, J., Meijer, Y., Brinksma, E., Veihelmann, B., and Ingmann, P.: GMES Sentinels 4 and 5  
24 Mission Requirements Document (MRD), ESA, EO-SMA-/1507/JL, issue: 3, 2011.

1 Lee, C., Martin, R. V., van Donkelaar, A., O’Byrne, G., Krotkov, N., Richter, A., Huey, L. G., and  
2 Holloway, J.S.: Retrieval of vertical columns of sulfur dioxide from SCIAMACHY and OMI: Air  
3 mass factor algorithm development, validation, and error analysis, *J. Geophys. Res.*, 114,  
4 D22303, doi:10.1029/2009JD012123, 2009.

5  
6 Levelt, P., Veefkind, J., Kerridge, B., Siddans, R., de Leeuw, G., Remedios, J., and Coheur, P.:  
7 Observation Techniques and Mission Concepts for Atmospheric Chemistry (CAMELOT),  
8 Report, European Space Agency, Noordwijk, The Netherlands, 2009.

9  
10 Loyola et al., S5P Cloud Products ATBD, available at:  
11 <https://sentinel.esa.int/web/sentinel/technical-guides/sentinel-5p/appendices/references>  
12 and <http://www.tropomi.eu/documents/level-2-products>, 2016.

13  
14 Martin, R. V., Chance, K., Jacob, D. J., Kurosu, T. P., Spurr, R. J. D., Bucsela, E., Gleason, J.F.,  
15 Palmer, P.I., Bey, I., Fiore, A.M., Li, Q., Yantosca, R.M., and Koelemeijer, R.B.A.: An improved  
16 retrieval of tropospheric nitrogen dioxide from GOME, *J. Geophys. Res.*, 107(D20), 4437,  
17 doi:10.1029/2001JD001027, 2002.

18  
19 McLinden, C.A., Fioletov, V., Shephard, M.W., Krotkov, N., Li, C., Martin, R.V., Moran, M.D.,  
20 and Joiner, J.: Space-based detection of missing sulfur dioxide sources of global air pollution,  
21 *Nature Geoscience*, 9, 496-500, doi:10.1038/ngeo2724, 2016.

22  
23 Nowlan, C.R., Liu, X., Chance, K., Cai, Z., Kurosu, T.P., Lee, C., and Martin, R.V.: Retrievals of  
24 sulfur dioxide from the Global Ozone Monitoring Experiment 2 (GOME-2) using an optimal  
25 estimation approach: Algorithm and initial validation, *J. Geophys. Res.*, 116, D18301,  
26 doi:10.1029/2011JD015808, 2011.

Palmer, P. I., Jacob, D. J., Chance, K. V., Martin, R. V., D, R. J., Kurosu, T. P., Bey, I., Yantosca, R. and Fiore, A.: Air mass factor formulation for spectroscopic measurements from satellites: Application to formaldehyde retrievals from the Global Ozone Monitoring Experiment, Journal of Geophysical Research, 106(D13), 14539-14550, doi:10.1029/2000JD900772, 2001.

Platt, U., and Stutz, J.: Differential Optical Absorption Spectroscopy (DOAS), Principle and Applications, ISBN 3-340-21193-4, Springer Verlag, Heidelberg, 2008.

Pedernana, M., et al., S5P Level 2 Product User Manual Sulfur Dioxide SO<sub>2</sub>, available at: <https://sentinel.esa.int/web/sentinel/technical-guides/sentinel-5p/appendices/references> and <http://www.tropomi.eu/documents/level-2-products>, 2016.

Puķīte, J., Köhl, S., Deutschmann, T., Platt, U., and Wagner, T.: Extending differential optical absorption spectroscopy for limb measurements in the UV, Atmos. Meas. Tech., 3, 631-653, 2010.

Richter, A., Wittrock, F., Schönhardt, A., and Burrows, J.P.: Quantifying volcanic SO<sub>2</sub> emissions using GOME2 measurements, Geophys. Res. Abstr., EGU2009-7679, EGU General Assembly 2009, Vienna, Austria, 2009.

Richter, A., Begoin, M., Hilboll, A., and Burrows, J. P.: An improved NO<sub>2</sub> retrieval for the GOME-2 satellite instrument, Atmos. Meas. Tech., 4(6), 213-246, doi:10.5194/amt-4-1147-2011, 2011.

Rix, M., Valks, P., Hao, N., Loyola, D. G., Schlager, H., Huntrieser, H. H., Flemming, J., Koehler, U., Schumann, U., and Inness, A.: Volcanic SO<sub>2</sub>, BrO and plume height estimations using

GOME-2 satellite measurements during the eruption of Eyjafjallajökull in May 2010, J. Geophys. Res., 117, D00U19, doi:10.1029/2011JD016718, 2012.

Robock, A.: Volcanic eruptions and climate, Rev. Geophys., 38, 191–219, 2000.

Rozanov, A., Rozanov, V., and Burrows, J. P.: A numerical radiative transfer model for a spherical planetary atmosphere: Combined differential integral approach involving the Piccard iterative approximation, J. Quant. Spectrosc. Radiat. Transfer, 69, 491–512, 2001.

Sanders, B., et al., S5P ATBD of the Aerosol Layer Height product, available at: <https://sentinel.esa.int/web/sentinel/technical-guides/sentinel-5p/appendices/references> and <http://www.tropomi.eu/documents/level-2-products>, 2016.

Schumann, U., Weinzierl, B., Reitebuch, O., Schlager, H., Minikin, A., Forster, C., Baumann, R., Sailer, T., Graf, K., Mannstein, H., Voigt, C., Rahm, S., Simmet, R., Scheibe, M., Lichtenstern, M., Stock, P., Růba, H., Schauble, D., Tafferner, A., Rautenhaus, M., Gerz, T., Ziereis, H., Krautstrunk, M., Mallaun, C., Gayet, J.-F., Lieke, K., Kandler, K., Ebert, M., Weinbruch, S., Stohl, A., Gasteiger, J., Groß, S., Freudenthaler, V., Wiegner, M., Ansmann, A., Tesche, M., Olafsson, H., and Sturm, K.: Airborne observations of the Eyjafjalla volcano ash cloud over Europe during air space closure in April and May 2010, Atmos. Chem. Phys., 11, 2245–2279, doi:10.5194/acp-11-2245-2011, 2011.

Spinei, E., Carn, S.A., Krotkov, N.A., Mount, G.H., Yang, K., and Krueger, A.J.: Validation of ozone monitoring instrument SO<sub>2</sub> measurements in the Okmok volcanic plume over Pullman, WA in July 2008, J. Geophys. Res., Okmok-Kasatochi Special Issue, 115, D00L08, doi:10.1029/2009JD013492, 2010

1 Spurr, R., LIDORT and VLIDORT: Linearized pseudo-spherical scalar and vector discrete  
2 ordinate radiative transfer models for use in remote sensing retrieval problems. *Light*  
3 *Scattering Reviews*, Volume 3, ed. A. Kokhanovsky, Springer, 2008.

4  
5 Spurr, R., de Haan, J.F., van Oss, R., and Vasilkov, A.: Discrete Ordinate Radiative Transfer in a  
6 Stratified Medium with First Order Rotational Raman Scattering, *J. Quant. Spectros. Rad.*  
7 *Transf.*, 2008, 109, 3, 404-425, doi:10.1016/j.jqsrt.2007.08.011, 2008.

8  
9 Theys, N., Campion, R., Clarisse, L., Brenot, H., van Gent, J., Dils, B., Corradini, S., Merucci, L.,  
10 Coheur, P.-F, Van Roozendaal, M., Hurtmans, D., Clerbaux, C., Tait, S., Ferrucci, F.: Volcanic  
11 SO<sub>2</sub> fluxes derived from satellite data: a survey using OMI, GOME-2, IASI and MODIS, *Atmos.*  
12 *Chem. Phys.*, 13, 5945–5968, 2013.

13  
14 Theys, N., De Smedt, I., van Gent, J., Danckaert, T., Wang, T., Hendrick, F., Stavrou, T.,  
15 Bauduin, S., Clarisse, L., Li, C., Krotkov, N. A., Yu, H., Van Roozendaal, M.: Sulfur dioxide  
16 vertical column DOAS retrievals from the Ozone Monitoring Instrument: Global observations  
17 and comparison to ground-based and satellite data, *J. Geophys. Res. Atmos.*, 120,  
18 doi:10.1002/2014JD022657, 2015.

19 Thomas, W., Erbertseder, T., Ruppert, T., van Roozendaal, M., Verdebout, J., Balis, D., Meleti,  
20 C., and Zerefos, C.: On the retrieval of volcanic sulfur dioxide emissions from GOME  
21 backscatter measurements, *J. Atmos. Chem.*, 50, 295–320, doi:10.1007/s10874-005-5544-1,  
22 2005.

23  
24 van der A, R., Mijling, B., Ding, J., Koukouli, M., Liu, F., Li, Q., Mao, H., and Theys, N.: Cleaning  
25 up the air: Effectiveness of air quality policy for SO<sub>2</sub> and NO<sub>x</sub> emissions in China, *Atmos.*  
26 *Chem. Phys. Discuss.*, doi:10.5194/acp-2016-445, in review, 2016.

Vandaele, A.C., Hermans, C., Simon, P.C., Carleer, M., Colin, R., Fally, S., Mérienne, M.F., Jenouvrier, A., and Coquart, B.: Measurements of the NO<sub>2</sub> absorption cross-section from 42000 cm<sup>-1</sup> to 10000 cm<sup>-1</sup> (238-1000 nm) at 220 K and 294 K, J. Quant. Spectrosc. Radiat. Transfer, 59, 171-184, 1998.

Vandaele, A. C., Hermans, C., and Fally, S.: Fourier transform measurements of SO<sub>2</sub> absorption cross sections: II. Temperature dependence in the 29000–44000 cm<sup>-1</sup> (227–345 nm) region, J. Quant. Spectrosc. Radiat. Transfer, 110, 2115–2126, doi:10.1016/j.jqsrt.2009.05.006, 2009.

van Geffen, J., van Roozendaal, M., Rix, M., and Valks, P.: Initial Validation of GOME-2 GDP 4.2 SO<sub>2</sub> Total Columns—ORR B, TN-IASB-GOME2-O3MSAF-SO2-01, Sep. 2008

van Geffen, J., et al.: S5P NO<sub>2</sub> data products ATBD, available at: <https://sentinel.esa.int/web/sentinel/technical-guides/sentinel-5p/appendices/references> and <http://www.tropomi.eu/documents/level-2-products>, 2016.

van Weele, M., Levelt, P., Aben, I., Veefkind, P., Dobber, M., Eskes, H., Houweling, S., Landgraf, J., Noordhoek, R. : Science Requirements Document for TROPOMI. Volume 1, KNMI & SRON, RS-TROPOMI-KNMI-017, issue: 2.0, 2008.

Veefkind, J.P., Aben, I., McMullan, K., Förster, H., de Vries, J., Otter, G., Claas, J., Eskes, H.J., de Haan, J.F., Kleipool, Q., van Weele, M., Hasekamp, O., Hoogeveen, R., Landgraf, J., Snel, R., Tol, P., Ingmann, P., Voors, R., Kruizinga, B., Vink, R., Visser, H., and Levelt, P.F.: TROPOMI on the ESA Sentinel-5 Precursor: A GMES mission for global observations of the atmospheric composition for climate, air quality and ozone layer applications, Remote Sensing of Environment, doi:10.1016/j.rse.2011.09.027, 2012.



Vountas, M., Rozanov, V. V. and Burrows, J. P.: Ring effect: impact of rotational Raman scattering on radiative transfer in earth's atmosphere, *J. of Quant. Spec. and Rad. Trans.*, 60(6), 943-961, 36 1998.

Wang, Y., Beirle, S., Lampel, J., Koukouli, M., De Smedt, I., Theys, N., Xie, P. H., Van Roozendael, M., and Wagner, T.: Validation of OMI and GOME-2A and GOME-2B tropospheric NO<sub>2</sub>, SO<sub>2</sub> and HCHO products using MAX-DOAS observations from 2011 to 2014 in Wuxi, China, submitted to *Atmos. Chem. Phys. Discuss.*, 2016.

Wagner, T., Burrows, J. P., Deutschmann, T., Dix, B., von Friedeburg, C., Frieß, U., Hendrick, F., Heue, K.-P., Irie, H., Iwabuchi, H., Kanaya, Y., Keller, J., McLinden, C. A., Oetjen, H., Palazzi, E., Petritoli, A., Platt, U., Postolyakov, O., Pukite, J., Richter, A., van Roozendael, M., Rozanov, A., Rozanov, V., Sinreich, R., Sanghavi, S., and Wittrock, F.: Comparison of box-air-mass-factors and radiances for Multiple-Axis Differential Optical Absorption Spectroscopy (MAX-DOAS) geometries calculated from different UV/visible radiative transfer models, *Atmos. Chem. Phys.*, 7, 1809-1833, 2007.

Wagner, T., Beirle, S., and Deutschmann, T.: Three-dimensional simulation of the Ring effect in observations of scattered sun light using Monte Carlo radiative transfer models. *Atm. Meas. Tech.*, 2, 113-124, 2009.

Yang, K., Krotkov, N., Krueger, A., Carn, S., Bhartia, P. K., and Levelt, P.: Retrieval of Large Volcanic SO<sub>2</sub> columns from the Aura Ozone Monitoring Instrument (OMI): Comparisons and Limitations, *J. Geophys. Res.*, 112, D24S43, doi:10.1029/2007JD008825, 2007.

1 Yang, K., Liu, X., Bhartia, P., Krotkov, N., Carn, S., Hughes, E., Krueger, A., Spurr, R., Trahan, S.:  
2 Direct retrieval of sulfur dioxide amount and altitude from spaceborne hyperspectral UV  
3 measurements: Theory and application, J. Geophys. Res., 115, D00L09,  
4 doi:10.1029/2010JD013982, 2010.

5  
6 Yang, K., Dickerson, R. R., Carn, S. A., Ge, C., and Wang, J.: First observations of SO<sub>2</sub> from the  
7 satellite Suomi NPP OMPS: Widespread air pollution events over China, Geophys. Res. Lett.,  
8 40, 4957–4962, doi:10.1002/grl.50952.

9  
10 Zhou, Y., Brunner, D., Boersma, K. F., Dirksen, R., and Wang, P.: An improved tropospheric  
11 NO<sub>2</sub> retrieval for OMI observations in the vicinity of mountainous terrain, Atmos. Meas.  
12 Tech., 2, 401-416, doi:10.5194/amt-2-401-2009, 2009.

13 Zweers, D. (editor) et al.: TRAQ Performance Analysis and Requirements Consolidation for  
14 the Candidate Earth Explorer Mission TRAQ, Final report, KNMI, RP-ONTRAQ-KNMI-051,  
15 issue: 1.0, 2010.

16 Zweers, S., et al., S5P ATBD for the UV aerosol index, available at:  
17 <https://sentinel.esa.int/web/sentinel/technical-guides/sentinel-5p/appendices/references>  
18 and <http://www.tropomi.eu/documents/level-2-products>, 2016.

Table 1. Requirements on SO<sub>2</sub> vertical column products as derived from the MRTD. Numbers denote accuracy / precision, respectively.

|                               | Horizontal resolution [km] | Required uncertainty                                                          | Achievable uncertainty                                     | Theme (Table MRTD) | in |
|-------------------------------|----------------------------|-------------------------------------------------------------------------------|------------------------------------------------------------|--------------------|----|
| Enhanced stratospheric column | 50-200                     | 30% for VCD>0.5 DU                                                            | Met for VCD > 0.5DU                                        | A3                 |    |
| Tropospheric column           | 5-20                       | 30-60% or 1.3 x 10 <sup>15</sup> molecules cm <sup>-2</sup> (least stringent) | 50%<br>/<br>3-6 x 10 <sup>16</sup> molec. cm <sup>-2</sup> | B1, B2, B3         |    |
| Total column                  | 5-20                       | 30-60% or 1.3 x 10 <sup>15</sup> molecules cm <sup>-2</sup> (least stringent) | 50%<br>/<br>3-6 x 10 <sup>16</sup> molec. cm <sup>-2</sup> | B1, B2, B3         |    |

1 Table 2. DOAS settings used to retrieved SO<sub>2</sub> slant columns

2

|                                          |                                                                                                                                                                                                                                                                                                                                                                                                                                  |
|------------------------------------------|----------------------------------------------------------------------------------------------------------------------------------------------------------------------------------------------------------------------------------------------------------------------------------------------------------------------------------------------------------------------------------------------------------------------------------|
| <b>Fitting intervals 1 and 2</b>         | 312-326 nm (w1), 325-335 nm (w2)                                                                                                                                                                                                                                                                                                                                                                                                 |
| <b>Cross-sections</b>                    | SO <sub>2</sub> : 203K ( <i>Bogumil et al.</i> , 2003)<br>O <sub>3</sub> : 228K and 243K with <i>Io</i> correction ( <i>Brion et al.</i> , 1998)<br>Pseudo O <sub>3</sub> cross sections ( $\lambda\sigma_{O_3}$ , $\sigma_{O_3}^2$ ) ( <i>Puķīte et al.</i> , 2010)<br>Ring effect: 2 eigenvectors ( <i>Vountas et al.</i> , 1998) generated for 20° and 87° solar zenith angles using LIDORT-RRS ( <i>Spurr et al.</i> , 2008) |
| <b>Polynomial</b>                        | 5 <sup>th</sup> order                                                                                                                                                                                                                                                                                                                                                                                                            |
| <b>Fitting interval 3</b>                | 360-390 nm (w3)                                                                                                                                                                                                                                                                                                                                                                                                                  |
| <b>Cross-sections</b>                    | SO <sub>2</sub> : <i>Hermans et al.</i> (2009) extrapolated at 203K<br>NO <sub>2</sub> : 220K ( <i>Vandaele et al.</i> , 1998)<br>O <sub>2</sub> -O <sub>2</sub> : <i>Greenblatt et al.</i> , 1990<br>Ring effect: single spectrum ( <i>Chance and Spurr</i> , 1997)                                                                                                                                                             |
| <b>Polynomial</b>                        | 4 <sup>th</sup> order                                                                                                                                                                                                                                                                                                                                                                                                            |
| <b>Intensity offset correction</b>       | Linear offset                                                                                                                                                                                                                                                                                                                                                                                                                    |
| <b>Spectrum shift and stretch</b>        | Fitted                                                                                                                                                                                                                                                                                                                                                                                                                           |
| <b>Spectral spikes removal procedure</b> | <i>Richter et al.</i> [2011]                                                                                                                                                                                                                                                                                                                                                                                                     |
| <b>Reference spectrum</b>                | Baseline: Daily solar irradiance<br>Foreseen update: Daily averaged earthshine spectrum in Pacific region (10°S-10°N, 160°E-120°W); separate spectrum for each detector row. NRT: averaged spectra of the last available day, Off-line: averaged spectra of the current day                                                                                                                                                      |

3

Table 3. Criteria for selecting alternative fitting windows.

| Window number        | w1                       | w2                           | w3                            |
|----------------------|--------------------------|------------------------------|-------------------------------|
| Wavelength range     | 312 – 326 nm             | 325-335 nm                   | 360-390 nm                    |
| Derived slant column | S1                       | S2                           | S3                            |
| Application          | Baseline for every pixel | S1 > 15 DU<br>and<br>S2 > S1 | S2 > 250 DU<br>and<br>S3 > S2 |

1

2

3

4

5

6

7

8

9

10

11

12

Table 4. Physical parameters that define the WF look-up table.

| Parameter                                                                                | Number of grid points | Grid values                                                                                                                                                                                                                                                                                                                                                                                                                                                                                                   | Symbol     |
|------------------------------------------------------------------------------------------|-----------------------|---------------------------------------------------------------------------------------------------------------------------------------------------------------------------------------------------------------------------------------------------------------------------------------------------------------------------------------------------------------------------------------------------------------------------------------------------------------------------------------------------------------|------------|
| Atmospheric pressure [hPa]                                                               | 64                    | 1056.77, 1044.17, 1031.72, 1019.41, 1007.26, 995.25, 983.38, 971.66, 960.07, 948.62, 937.31, 926.14, 915.09, 904.18, 887.87, 866.35, 845.39, 824.87, 804.88, 785.15, 765.68, 746.70, 728.18, 710.12, 692.31, 674.73, 657.60, 640.90, 624.63, 608.58, 592.75, 577.34, 562.32, 547.70, 522.83, 488.67, 456.36, 425.80, 396.93, 369.66, 343.94, 319.68, 296.84, 275.34, 245.99, 210.49, 179.89, 153.74, 131.40, 104.80, 76.59, 55.98, 40.98, 30.08, 18.73, 8.86, 4.31, 2.18, 1.14, 0.51, 0.14, 0.03, 0.01, 0.001 | $p_i$      |
| Altitude corresponding to the atmospheric pressure, using an US standard atmosphere [km] | 64                    | -0.35, -0.25, -0.15, -0.05, 0.05, 0.15, 0.25, 0.35, 0.45, 0.55, 0.65, 0.75, 0.85, 0.95, 1.10, 1.30, 1.50, 1.70, 1.90, 2.10, 2.30, 2.50, 2.70, 2.90, 3.10, 3.30, 3.50, 3.70, 3.90, 4.10, 4.30, 4.50, 4.70, 4.90, 5.25, 5.75, 6.25, 6.75, 7.25, 7.75, 8.25, 8.75, 9.25, 9.75, 10.50, 11.50, 12.50, 13.50, 14.50, 16.00, 18.00, 20.00, 22.00, 24.00, 27.50, 32.50, 37.50, 42.50, 47.50, 55.00, 65.00, 75.00, 85.00, 95.00                                                                                        | $z_i$      |
| Solar zenith angle [°]                                                                   | 17                    | 0, 10, 20, 30, 40, 45, 50, 55, 60, 65, 70, 72, 74, 76, 78, 80, 85                                                                                                                                                                                                                                                                                                                                                                                                                                             | $\theta_0$ |
| Line of sight angle [°]                                                                  | 10                    | 0, 10, 20, 30, 40, 50, 60, 65, 70, 75                                                                                                                                                                                                                                                                                                                                                                                                                                                                         | $\theta$   |
| Relative azimuth angle [°]                                                               | 5                     | 0, 45, 90, 135, 180                                                                                                                                                                                                                                                                                                                                                                                                                                                                                           | $\phi$     |
| Total ozone column [DU]                                                                  | 4                     | 205, 295, 385, 505                                                                                                                                                                                                                                                                                                                                                                                                                                                                                            | TO3        |
| Surface albedo                                                                           | 14                    | 0, 0.01, 0.025, 0.05, 0.075, 0.1, 0.15, 0.2, 0.25, 0.3, 0.4, 0.6, 0.8, 1.0                                                                                                                                                                                                                                                                                                                                                                                                                                    | $A_s$      |
| Surface / cloud top pressure [hPa]                                                       | 17                    | 1063.10, 1037.90, 1013.30, 989.28, 965.83, 920.58, 876.98, 834.99, 795.01, 701.21, 616.60, 540.48, 411.05, 308.00, 226.99, 165.79, 121.11                                                                                                                                                                                                                                                                                                                                                                     | $p_s$      |
| AMF Wavelength                                                                           | 3                     | 313, 326, 375                                                                                                                                                                                                                                                                                                                                                                                                                                                                                                 |            |

1

2

3

4

5

Table 5. Systematic and random error components contributing to the total uncertainty on the SO<sub>2</sub> slant column.

| # | Error source                                  | Type* | Parameter uncertainty                                                                            | Typical uncertainty on SO <sub>2</sub> SCD                                                                                                                                                                              |
|---|-----------------------------------------------|-------|--------------------------------------------------------------------------------------------------|-------------------------------------------------------------------------------------------------------------------------------------------------------------------------------------------------------------------------|
| 1 | SO <sub>2</sub> absorption cross section      | S     | 6% (window 1)<br>6% (window 2)<br>unknown (window 3)                                             | 6%                                                                                                                                                                                                                      |
| 2 | SO <sub>2</sub> and O <sub>3</sub> absorption | S & R |                                                                                                  | Errors 9 & 10                                                                                                                                                                                                           |
| 3 | Other atmospheric absorption or interference  | S & R |                                                                                                  | Error 9                                                                                                                                                                                                                 |
| 4 | Radiance shot noise                           | R     | S/N=800-1000                                                                                     | 0.3-0.5 DU (window 1)<br>5 DU (window 2)<br>60 DU (window 3)                                                                                                                                                            |
| 5 | DOAS settings                                 | S     | 1 nm, polynomial order                                                                           | <11% (window 1)<br><6% (window 2)<br><8% (window 3)                                                                                                                                                                     |
| 6 | Wavelength and radiometric calibration        | S     | Wavelength Calibration.<br><br>Radiometric calibration. Additive errors should remain below 2 %. | Wavelength calibration and spectral shifts can be corrected by the algorithm to less than 5 % effect on the slant column.<br><br>Intensity offset correction in principle treats (small) radiometric calibration errors |
| 7 | Spectral response function                    |       | TBD                                                                                              | TROPOMI-specific<br>Expected uncertainty: 10%                                                                                                                                                                           |
| 8 | Other spectral features                       |       | Strongly dependent on interfering signal                                                         | -                                                                                                                                                                                                                       |
| 9 | Background correction                         | S & R |                                                                                                  | 0.2 DU                                                                                                                                                                                                                  |

\* R: random, S: systematic

Table 6. Systematic and random error components contributing to the total uncertainty on the SO<sub>2</sub> air mass factor.

| #                          | Error                           | Type*                                                  | Parameter uncertainty                  | Typical uncertainty on the AMF                                                                                                                 |
|----------------------------|---------------------------------|--------------------------------------------------------|----------------------------------------|------------------------------------------------------------------------------------------------------------------------------------------------|
| 10                         | AMF wavelength dependence       | S                                                      |                                        | 10%                                                                                                                                            |
| 11                         | Model atmosphere                | S                                                      | O <sub>3</sub> profile<br>P,T profiles | ~5-10%<br>small                                                                                                                                |
| 12                         | Forward model                   | S                                                      | < 5%                                   | <5%                                                                                                                                            |
| 13                         | Surface albedo <sup>†</sup>     | S                                                      | 0.02                                   | 15% (PBL)<br>5% (FT)<br>1% (LS)                                                                                                                |
| 14                         | Cloud fraction <sup>†</sup>     | R                                                      | 0.05                                   | 5% (PBL)<br>15% (FT)<br>1% (LS)                                                                                                                |
| 15                         | Cloud top pressure <sup>†</sup> | R                                                      | 50 hPa                                 | 50% (PBL)<br>50% (FT)<br>1% (LS)                                                                                                               |
| 16                         | Cloud correction                | R                                                      |                                        | < 5% on yearly averaged data                                                                                                                   |
| 17                         | Cloud model                     |                                                        | TBD                                    |                                                                                                                                                |
| 18                         | SO <sub>2</sub> profile shape   | S                                                      |                                        | anthropogenic SO <sub>2</sub><br>20%-35%<br><br>volcanic SO <sub>2</sub><br>large (low albedo), < 50% (high albedo)                            |
| 19                         | Aerosol                         | S & R                                                  |                                        | Anthropogenic SO <sub>2</sub> ≈ 15% (Nowlan et al., 2011).<br>Volcanic SO <sub>2</sub> (aerosols: ash/sulphate) :<br>~ 20% (Yang et al., 2010) |
| 20                         | Temperature correction          | R                                                      |                                        | ~5%                                                                                                                                            |
| * R: random, S: systematic |                                 | <sup>†</sup> Effect on the AMF estimated from Figure 6 |                                        |                                                                                                                                                |



- 1 Table A1. List of output fields in the TROPOMI SO<sub>2</sub> products. nAlong x nAcross corresponds
- 2 to the number of pixels in an orbit along track and across track, respectively.

| Name/Data             | Symbol      | Unit                | Description                                         | Data type  | Number of entries per observation |
|-----------------------|-------------|---------------------|-----------------------------------------------------|------------|-----------------------------------|
| <b>Date</b>           |             | n.u.                | Date and time of the measurement<br>YYMMDDHHMMSS.MS | characters | nAlong                            |
| <b>Latitudes</b>      | $lat$       | degree              | Latitudes of the four pixel corners + center        | float      | 5 x nAlong x nAcross              |
| <b>Longitudes</b>     | $lon$       | degree              | Longitudes of the four pixel corners + center       | float      | 5 x nAlong x nAcross              |
| <b>SZA</b>            | $\theta_0$  | degree              | Solar zenith angle                                  | float      | nAlong x nAcross                  |
| <b>VZA</b>            | $\theta$    | degree              | Viewing zenith angle                                | float      | nAlong x nAcross                  |
| <b>RAA</b>            | $\varphi$   | degree              | Relative azimuth angle                              | float      | nAlong x nAcross                  |
| <b>SCD</b>            | $N_s$       | mol.m <sup>-2</sup> | SO2 slant column density                            | float      | nAlong x nAcross                  |
| <b>SCDcorr</b>        | $N_s^c$     | mol.m <sup>-2</sup> | SO2 slant column density background corrected       | float      | nAlong x nAcross                  |
| <b>VCD</b>            | $N_v$       | mol.m <sup>-2</sup> | SO2 vertical column density<br>(4values)            | float      | 4 x nAlong x nAcross              |
| <b>Wdow flag</b>      | $Wflag$     | n.u.                | Flag for the fitting window used (1,2,3)            | integer    | nAlong x nAcross                  |
| <b>AMF</b>            | $M$         | n.u.                | Air mass factor (4values)                           | float      | 4 x nAlong x nAcross              |
| <b>Cloud free AMF</b> | $M_{clear}$ | n.u.                | Cloud Free Air mass factor (4values)                | float      | 4 x nAlong x nAcross              |
| <b>Cloudy AMF</b>     | $M_{cloud}$ | n.u.                | Fully Cloudy Air mass factor (4values)              | float      | 4 x nAlong x nAcross              |
| <b>CF</b>             | $f_c$       | n.u.                | Cloud fraction                                      | float      | nAlong x nAcross                  |
| <b>CRF</b>            | $\phi$      | n.u.                | Cloud radiance fraction                             | float      | nAlong x nAcross                  |

|                                                           |                        |                     |                                                                                                                                 |       |                          |
|-----------------------------------------------------------|------------------------|---------------------|---------------------------------------------------------------------------------------------------------------------------------|-------|--------------------------|
| <b>CP</b>                                                 | $p_{cloud}$            | Pa                  | Cloud top pressure                                                                                                              | float | nAlong x<br>nAcross      |
| <b>CH</b>                                                 | $z_{cloud}$            | m                   | Cloud top height                                                                                                                | float | nAlong x<br>nAcross      |
| <b>CA</b>                                                 | $A_{cloud}$            | n.u.                | Cloud top albedo                                                                                                                | float | nAlong x<br>nAcross      |
| <b>Albedo</b>                                             | $A_s$                  | n.u.                | Surface albedo                                                                                                                  | float | nAlong x<br>nAcross      |
| <b>Aerosol index</b>                                      | AAI                    | n.u.                | Absorbing Aerosol Index                                                                                                         | float | nAlong x<br>nAcross      |
| <b>Ch-squared</b>                                         | $Chi^2$                | n.u.                | Chi-squared of the fit                                                                                                          | float | nAlong x<br>nAcross      |
| <b>VCD error</b>                                          | $\sigma_{N_v}$         | mol.m <sup>-2</sup> | Total error on the vertical column<br>(individual measurement)                                                                  | float | 4x nAlong x<br>nAcross   |
| <b>SCD random<br/>error</b>                               | $\sigma_{N_{s\_rand}}$ | mol.m <sup>-2</sup> | Random error on the slant column                                                                                                | float | nAlong x<br>nAcross      |
| <b>SCD systematic<br/>error</b>                           | $\sigma_{N_{s\_syst}}$ | mol.m <sup>-2</sup> | Systematic error on the slant column                                                                                            | float | nAlong x<br>nAcross      |
| <b>AMF random<br/>error</b>                               | $\sigma_{M\_rand}$     | n.u.                | Random error on the air mass factor<br>(4values)                                                                                | float | 4x nAlong x<br>nAcross   |
| <b>AMF systematic<br/>error</b>                           | $\sigma_{M\_syst}$     | n.u.                | Systematic error on the air mass factor<br>(4 values)                                                                           | float | 4x nAlong x<br>nAcross   |
| <b>Averaging kernel</b>                                   | AK                     | n.u.                | Total column averaging kernel (for a-<br>priori profile from CTM)                                                               | float | 34 x nAlong x<br>nAcross |
| <b>Averaging kernel<br/>scalings for box<br/>profiles</b> | Scaling box            | n.u.                | Factors to apply to the averaging<br>kernel function to obtain the<br>corresponding averaging kernels for<br>the 3 box profiles | float | 3x nAlong x<br>nAcross   |
| <b>SO<sub>2</sub> profile</b>                             | $n_a$                  | n.u.                | A-priori profile from CTM (volume<br>mixing ratio)                                                                              | float | 34 x nAlong x<br>nAcross |
| <b>Surface altitude</b>                                   | $z_s$                  | m                   | Digital elevation map                                                                                                           | float | nAlong x<br>nAcross      |
| <b>Surface pressure</b>                                   | $p_s$                  | Pa                  | Effective surface pressure of the<br>satellite pixel                                                                            | float | nAlong x<br>nAcross      |
| <b>TM5 level<br/>coefficient a</b>                        | $A_i$                  | Pa                  | TM5 pressure level coefficients that<br>effectively define the mid-layer levels                                                 | float | 24                       |

|                            |       |      |              |       |    |
|----------------------------|-------|------|--------------|-------|----|
| TM5 level<br>coefficient b | $A_i$ | n.u. | (from ECMWF) | float | 24 |
|----------------------------|-------|------|--------------|-------|----|

1

2

3

4

5

6

7

8

9

10

11

12

13

14

15

1 Table A2. Static auxiliary data for the S5P SO<sub>2</sub> algorithm.

| Name/Data                                             | Sym<br>bol                               | Unit                                                                                | Source                                                                                             | Pre-process<br>needs                                                                                                                  | Comments                                                                                                                                                                                                     |
|-------------------------------------------------------|------------------------------------------|-------------------------------------------------------------------------------------|----------------------------------------------------------------------------------------------------|---------------------------------------------------------------------------------------------------------------------------------------|--------------------------------------------------------------------------------------------------------------------------------------------------------------------------------------------------------------|
| <b>Absorption cross-sections</b>                      |                                          |                                                                                     |                                                                                                    |                                                                                                                                       |                                                                                                                                                                                                              |
| <b>SO<sub>2</sub></b>                                 | $\sigma_{SO_2}$                          | cm <sup>2</sup> molec. <sup>-1</sup>                                                | Bogumil et al. (2003),<br>203K, 223K, 243K, 293K<br><br>Hermans et al. (2009), all<br>temperatures | Convolution at<br>the instrumental<br>spectral<br>resolution using<br>the provided slit<br>function                                   | -                                                                                                                                                                                                            |
| <b>Ozone</b>                                          | $\sigma_{03218}$<br>$\sigma_{03243}$     | cm <sup>2</sup> molec. <sup>-1</sup>                                                | Brion et al. (1998) ; 218K<br>and 243K.                                                            |                                                                                                                                       |                                                                                                                                                                                                              |
| <b>BrO</b>                                            | $\sigma_{BrO}$                           | cm <sup>2</sup> molec. <sup>-1</sup>                                                | Fleischmann et al.<br>(2004), 223K                                                                 |                                                                                                                                       |                                                                                                                                                                                                              |
| <b>NO<sub>2</sub></b>                                 | $\sigma_{NO_2}$                          | cm <sup>2</sup> molec. <sup>-1</sup>                                                | Vandaele et al. (1998),<br>220K                                                                    |                                                                                                                                       |                                                                                                                                                                                                              |
| <b>O<sub>4</sub> (O<sub>2</sub>-O<sub>2</sub>)</b>    | $\sigma_{O_4}$                           | cm <sup>5</sup> molec. <sup>-2</sup>                                                | Greenblatt et al. (1990)                                                                           |                                                                                                                                       |                                                                                                                                                                                                              |
| <b>High resolution reference<br/>solar spectrum</b>   | $E_s$                                    | W m <sup>-2</sup> nm <sup>-1</sup>                                                  | Chance and Kurucz, 2010                                                                            | -                                                                                                                                     | -                                                                                                                                                                                                            |
| <b>Ring effect</b>                                    | $\sigma_{ringev1}$<br>$\sigma_{ringev2}$ | cm <sup>2</sup> molec. <sup>-1</sup>                                                | 2 Ring cross-sections<br>generated internally.                                                     | A high-resolution<br>reference solar<br>spectrum and the<br>instrument slit<br>function are<br>needed to<br>generate the data<br>set. | Calculated in an ozone<br>containing atmosphere<br>for low and high SZA,<br>using LIDORT_RRS (Spurr<br>et al., 2008) and a<br>standard atmosphere<br>(Camelot European<br>Pollution atmospheric<br>profile). |
| <b>Non-linear O<sub>3</sub> absorption<br/>effect</b> | $\sigma_{03l}$<br>$\sigma_{03sq}$        | nm.cm <sup>2</sup> molec. <sup>-1</sup><br><br>cm <sup>4</sup> molec. <sup>-2</sup> | 2 pseudo-cross sections<br>generated internally.                                                   | The O <sub>3</sub> cross-<br>section at 218 K is<br>needed.                                                                           | Calculated from the<br>Taylor expansion of the<br>wavelength and the O <sub>3</sub><br>optical depth (Puķīte et<br>al., 2010).                                                                               |
| <b>Instrument slit function</b>                       | $SF$                                     | n.u.                                                                                | Slit Function by<br>wavelength/detector.                                                           | -                                                                                                                                     | Values between 300 and<br>400nm.                                                                                                                                                                             |
| <b>Surface Albedo</b>                                 | $A_s$                                    | n.u.                                                                                | OMI-based monthly<br>minimum LER (update of<br>Kleipool et al., 2008)                              | -                                                                                                                                     |                                                                                                                                                                                                              |
| <b>Digital elevation map</b>                          | $z_s$                                    | m                                                                                   | GMTED2010<br>(Danielson et al.,<br>2011)                                                           |                                                                                                                                       | Average over the ground<br>pixel area.                                                                                                                                                                       |
| <b>SO<sub>2</sub> profile</b>                         | $n_a$                                    | n.u.                                                                                | One kilometre thick box<br>profiles, with three<br>different peak altitudes,                       | -                                                                                                                                     | TM5 profiles from the last<br>available day in case<br>the TM5 profiles of the                                                                                                                               |

|                                                |          |                 |                                                                                                                                                                                                                                                                                           |   |                                                                                                                                            |
|------------------------------------------------|----------|-----------------|-------------------------------------------------------------------------------------------------------------------------------------------------------------------------------------------------------------------------------------------------------------------------------------------|---|--------------------------------------------------------------------------------------------------------------------------------------------|
|                                                |          |                 | <p>representing different altitude regimes:</p> <p>Boundary layer: from the surface altitude to 1km above it.</p> <p>Free troposphere: centred around 7 km altitude.</p> <p>Lower stratosphere: centred around 15 km altitude.</p> <p>Daily SO<sub>2</sub> profiles forecast from TM5</p> |   | current day are not available                                                                                                              |
| <b>Look-up table of pressure-resolved AMFs</b> | $m$      | n.u.            | Calculated internally with the LIDORTv3.3 RTM (Spurr, 2008).                                                                                                                                                                                                                              | - | For the different fitting windows (312-326 nm, 325-335 nm, 360-390 nm), the assumed vertical column is 5 DU, 100 DU, 500 DU, respectively. |
| <b>Temperature correction parameters</b>       | $\alpha$ | K <sup>-1</sup> | Bogumil et al. (2003)                                                                                                                                                                                                                                                                     | - | -                                                                                                                                          |

1

2

3

4

5

6

7

8

9

1 Table A3. Dynamic auxiliary data for the S5P SO<sub>2</sub> algorithm.

| Name/Data                   | Symbol      | Unit                                                            | Source                                                                                                 | Pre-process needs                                                        | Backup if not available                     |
|-----------------------------|-------------|-----------------------------------------------------------------|--------------------------------------------------------------------------------------------------------|--------------------------------------------------------------------------|---------------------------------------------|
| S5P level 1B Earth radiance | $I$         | $\text{mol s}^{-1} \text{m}^{-2} \text{nm}^{-1} \text{sr}^{-1}$ | S5P L1b product                                                                                        | -                                                                        | No retrieval                                |
| S5P level 1B sun irradiance | $E_0$       | $\text{mol s}^{-1} \text{m}^{-2} \text{nm}^{-1}$                | S5P L1b product                                                                                        | Wavelength recalibrated using a high-resolution reference solar spectrum | Use previous measurement                    |
| S5P Cloud fraction          | $f_c$       | n.u.                                                            | S5 P operational cloud product based on a Lambertian cloud model (Loyola et al., 2016) UPAS processor. | -                                                                        | No retrieval                                |
| S5P Cloud top pressure      | $p_{cloud}$ | Pa                                                              |                                                                                                        |                                                                          |                                             |
| S5P Cloud top albedo        | $A_{cloud}$ | n.u.                                                            |                                                                                                        |                                                                          |                                             |
| SO <sub>2</sub> profile     | $n_a$       | n.u.                                                            | Daily forecast from TM5 CTM run at KNMI.                                                               | -                                                                        | Use TM5 CTM profile from last available day |
| Temperature profile         | T           | K                                                               | Daily forecast from TM5 CTM run at KNMI.                                                               | -                                                                        | Use TM5 CTM profile from last available day |
| S5P Absorbing aerosol index | $AAI$       | n.u.                                                            | S5P operational AAI product (Zweers et al., 2016).<br>Used for flagging. KNMI processor.               | -                                                                        | Missing information flag.                   |
| Snow-ice flag               |             | n.u.                                                            | Near real-time global Ice and Snow Extent (NISE) data from NASA.                                       | -                                                                        | Use snow/ice climatology.                   |

2

3

4

5

6

# 1 Table A4. Acronyms and abbreviations

|          |                                                                                     |
|----------|-------------------------------------------------------------------------------------|
| AAI      | Absorbing Aerosol Index                                                             |
| AK       | Averaging Kernel                                                                    |
| AMF      | Air mass factor                                                                     |
| AOD      | Aerosol optical depth                                                               |
| AR       | Alternative retrieval                                                               |
| BrO      | Bromine Monoxide                                                                    |
| CAL      | Cloud As Layer                                                                      |
| CAMELOT  | Composition of the Atmospheric Mission concEpts and Sentinel Observation Techniques |
| CAPACITY | Composition of the Atmosphere: Progress to Applications in the user Community       |
| CCD      | Charged Coupled Device                                                              |
| CRB      | Clouds as Reflecting Boundaries                                                     |
| CTM      | Chemical Transport Model                                                            |
| DOAS     | Differential optical absorption spectroscopy                                        |
| DU       | Dobson Unit ( $1 \text{ DU} = 2.6867 \times 10^{16} \text{ molecules cm}^{-2}$ )    |
| ECMWF    | European Centre for Medium Range Weather Forecast                                   |
| ESA      | European Space Agency                                                               |
| FT       | Free-troposphere                                                                    |
| FWHM     | Full Width Half Maximum                                                             |
| GMES     | Global Monitoring for Environment and Security                                      |
| GOME-2   | Global Ozone Monitoring Experiment–2                                                |
| HCHO     | Formaldehyde                                                                        |
| IPA      | Independent Pixel Approximation                                                     |
| IR       | Infrared                                                                            |
| L2WG     | Level-2 Working Group                                                               |
| LER      | Lambertian Equivalent Reflector                                                     |
| LIDORT   | LInearized Discrete Ordinate Radiative Transfer                                     |
| LOS      | Line-of-sight angle                                                                 |
| LS       | Lower stratosphere                                                                  |
| LUT      | Look-up table                                                                       |
| MAX-DOAS | Multi-axis DOAS                                                                     |
| MR       | Medium Retrieval                                                                    |

|                 |                                                                       |
|-----------------|-----------------------------------------------------------------------|
| NO <sub>2</sub> | Nitrogen Dioxide                                                      |
| NOVAC           | Network for Observation of Volcanic and Atmospheric Change            |
| NRT             | Near-real time                                                        |
| OCRA            | Optical Cloud Recognition Algorithm                                   |
| O <sub>3</sub>  | Ozone                                                                 |
| OMI             | Ozone Monitoring Instrument                                           |
| OMPS            | Ozone Mapping Profiler Suite                                          |
| PA              | Prototype Algorithm                                                   |
| (P)BL           | Planetary Boundary Layer                                              |
| PCA             | Principal Component Analysis                                          |
| ROCINN          | Retrieval Of Cloud Information using Neural Networks                  |
| RRS             | Rotational Raman Scattering                                           |
| RTM             | Radiative transfer model                                              |
| RAA             | Relative azimuth angle                                                |
| S-5P            | Sentinel-5 Precursor                                                  |
| SCIAMACHY       | SCanning Imaging Absorption spectroMeter for Atmospheric ChartographY |
| SCD             | Slant column density                                                  |
| SCDE            | Slant column density error                                            |
| SNR             | Signal-to-noise ratio                                                 |
| SO <sub>2</sub> | Sulfur dioxide                                                        |
| SR              | Standard retrieval                                                    |
| SWIR            | Short-wave infrared                                                   |
| SZA             | Solar zenith angle                                                    |
| TOMS            | Total Ozone Mapping Spectrometer                                      |
| TROPOMI         | Tropospheric Monitoring Instrument                                    |
| UPAS            | Universal Processor for UV/VIS Atmospheric Spectrometers              |
| UV              | Ultraviolet                                                           |
| UVN             | Ultraviolet/Visible/Near-infrared                                     |
| VA              | Verification Algorithm                                                |
| VC(D)           | Vertical column density                                               |
| WF              | Weighting Function                                                    |

1

2



1

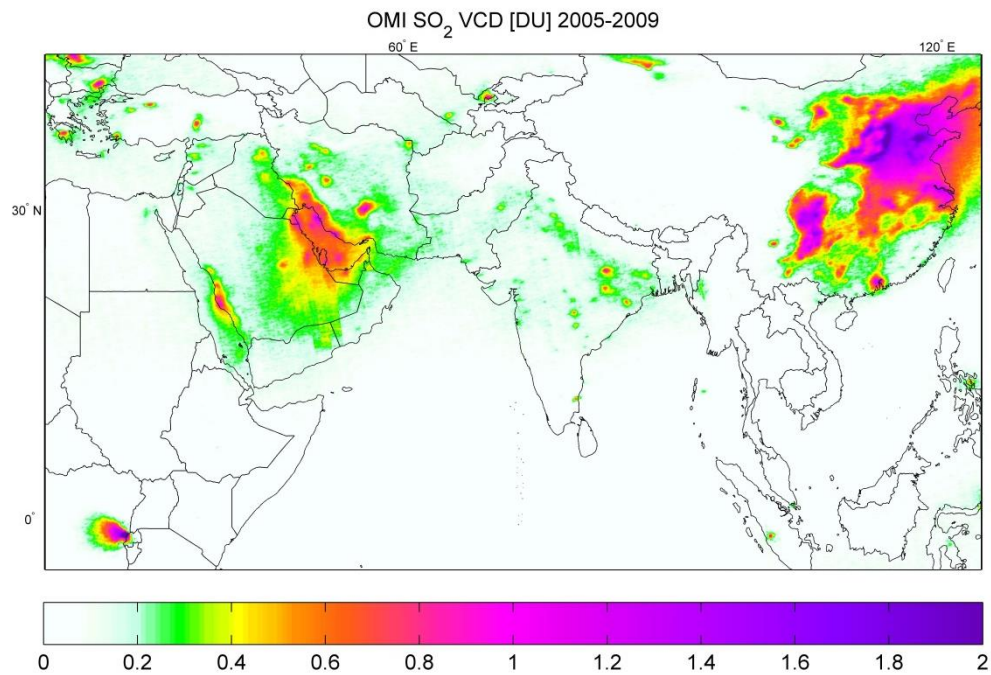

2

3 Figure 1: Map of averaged SO<sub>2</sub> columns from OMI clear-sky pixels for the 2005-2009 period.

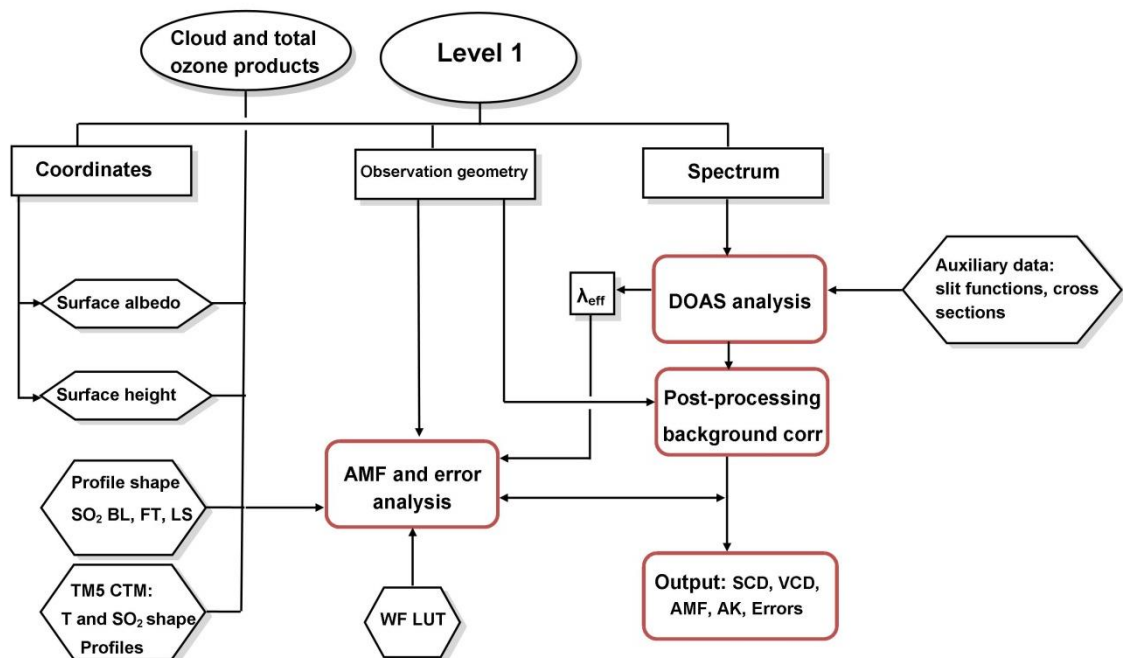

4

5 Figure 2. Flow Diagram of the TROPOMI DOAS retrieval algorithm for SO<sub>2</sub>.

1

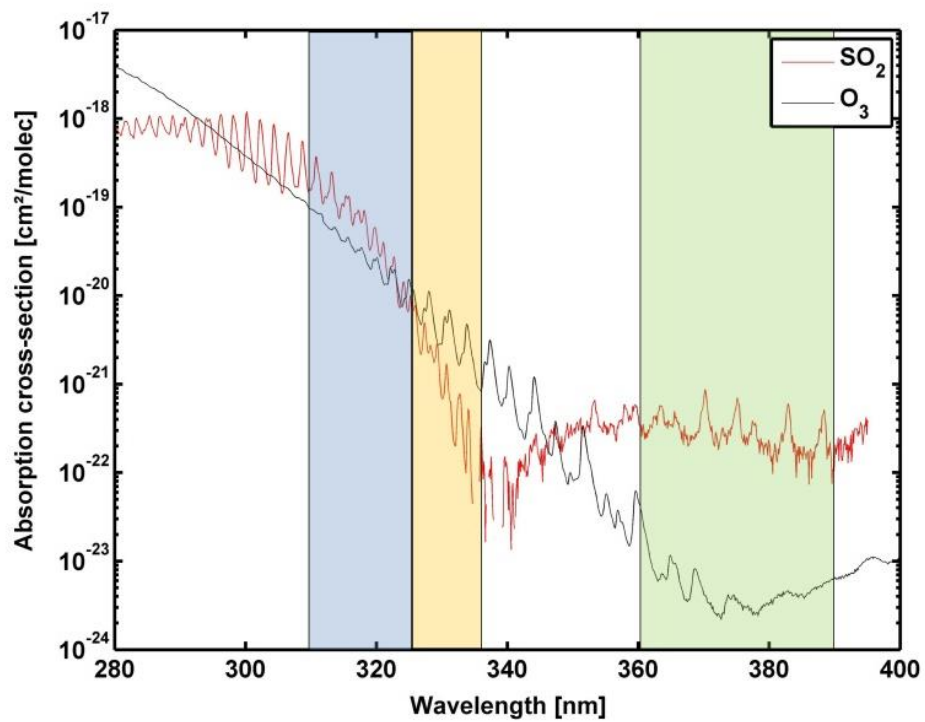

2

3 Figure 3. Absorption cross-sections of SO<sub>2</sub> and O<sub>3</sub>. The blue, yellow and green boxes delimit  
 4 the three SO<sub>2</sub> fitting windows 312-326 nm, 325-335 nm and 360-390 nm, respectively.

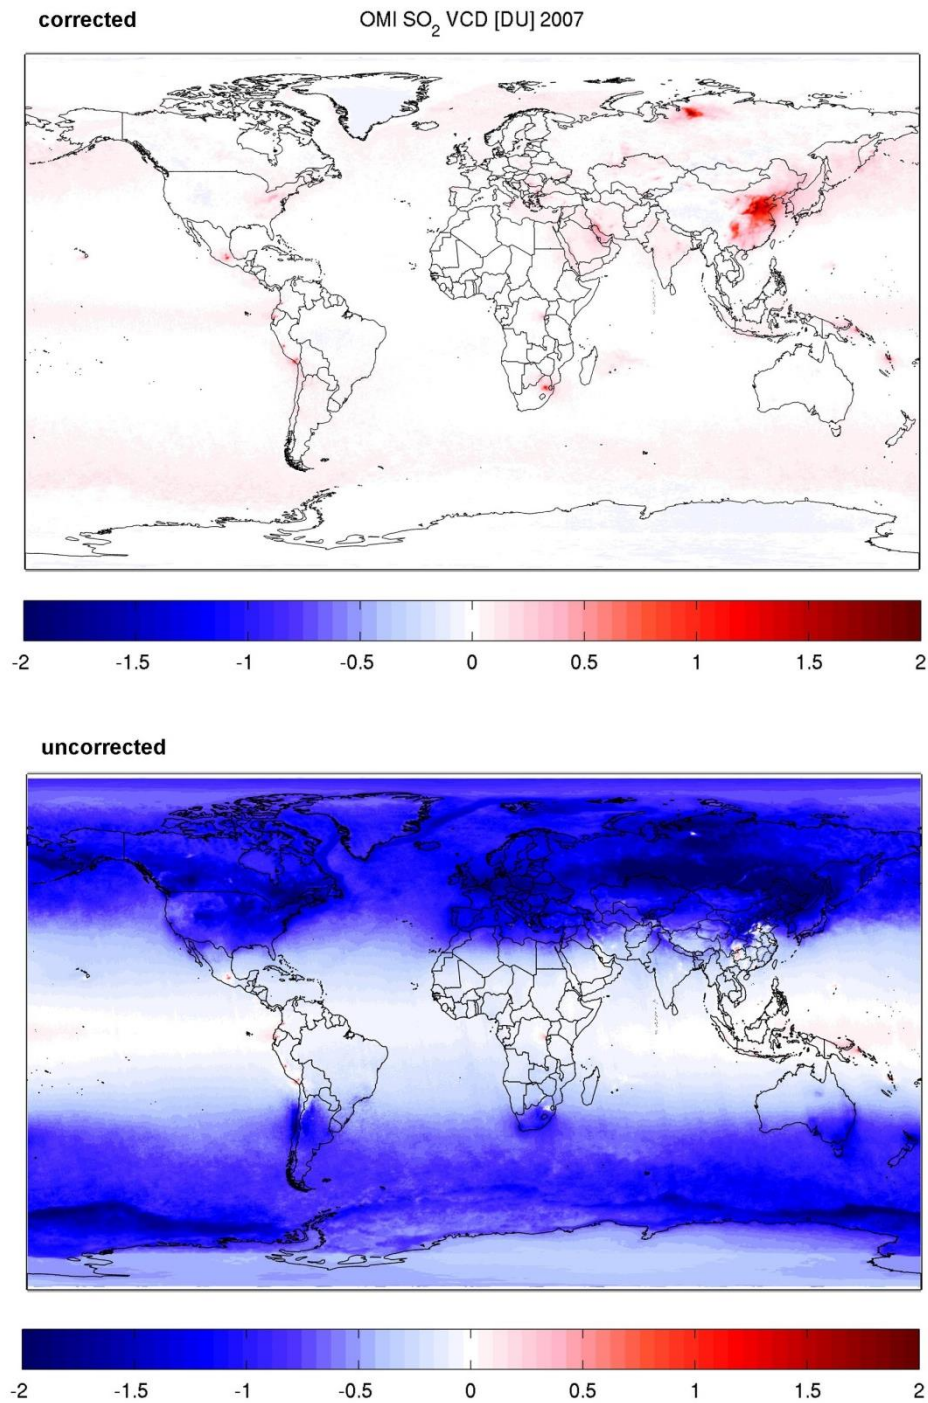

Figure 4. OMI SO<sub>2</sub> vertical columns (DU) averaged for the year 2007 (top) with and (bottom) without background correction. Only clear sky pixels (cloud fraction lower than 30%) have been kept. AMFs calculated from SO<sub>2</sub> profiles from the IMAGES global model are applied to the slant columns (Theys et al., 2015).

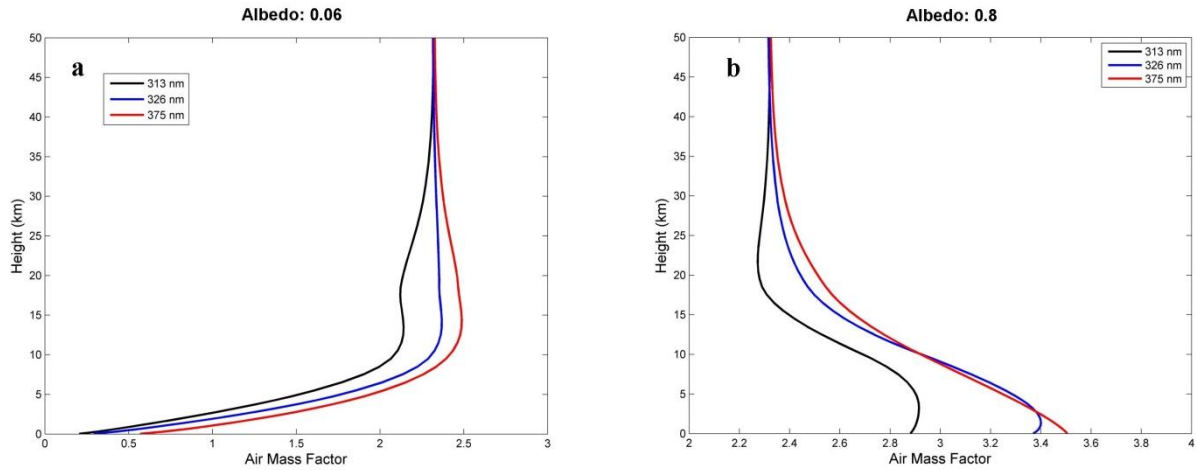

1

2 Figure 5. SO<sub>2</sub> box-AMFs at 313, 326 and 375nm for albedo of (a) 0.06 and (b) 0.8. SZA: 40°,  
 3 LOS: 10°, RAA: 0°, Surface height: 0 km.

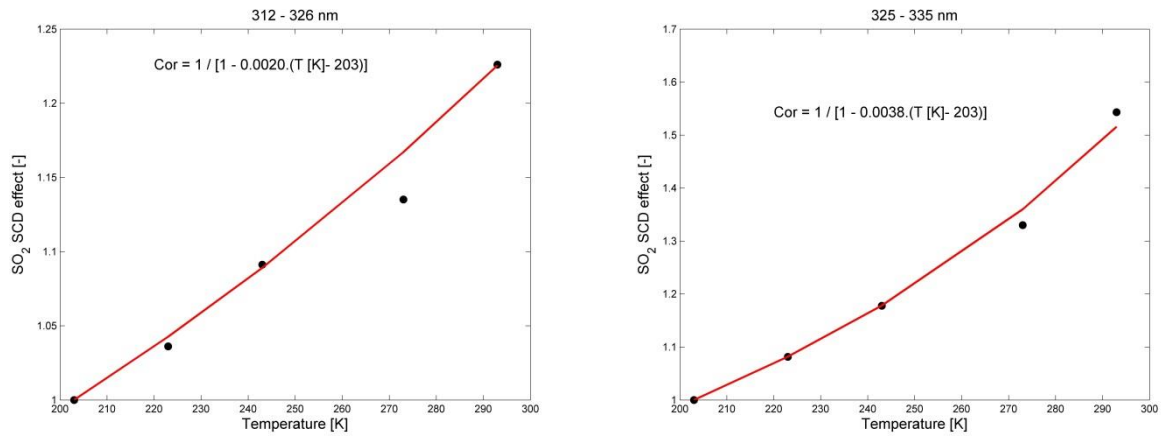

4 Figure 6. Effect of temperature (relative to 203K) on SO<sub>2</sub> retrieved SCD for fitting windows  
 5 312-326 nm (left) and 325-335 nm (right). The red lines show the adopted formulation of  
 6 C<sub>temp</sub> (Eq. 10). Note that, for the 312-326 nm window, the result at 273K has been discarded  
 7 from the fit as it is seems rather inconsistent with the dependence at other temperatures.

8

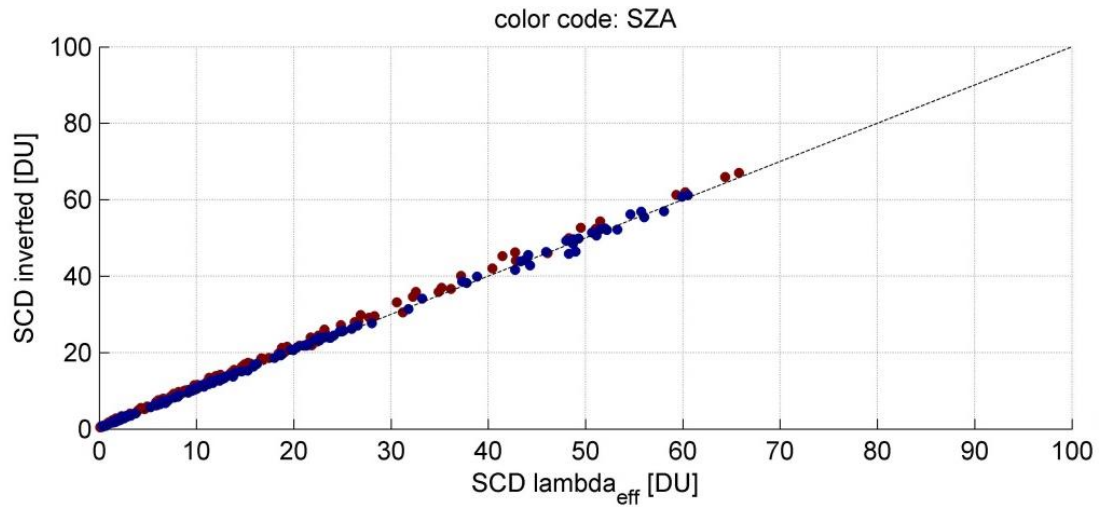

Figure 7. Retrieved SO<sub>2</sub> slant columns versus simulated SCDs at a wavelength of 313 nm from synthetic spectra (SZA: 30°, 70°) in the spectral range 312-326 nm and for SO<sub>2</sub> layers in the boundary layer, upper troposphere and lower stratosphere. The different points correspond to different values for the line-of-sight angle (0, 45°), surface albedo (0.06, 0.8), surface height (0, 5 km) and total ozone column (350, 500 DU). SO<sub>2</sub> vertical columns as input of the RT simulations are maximum of 25 DU.

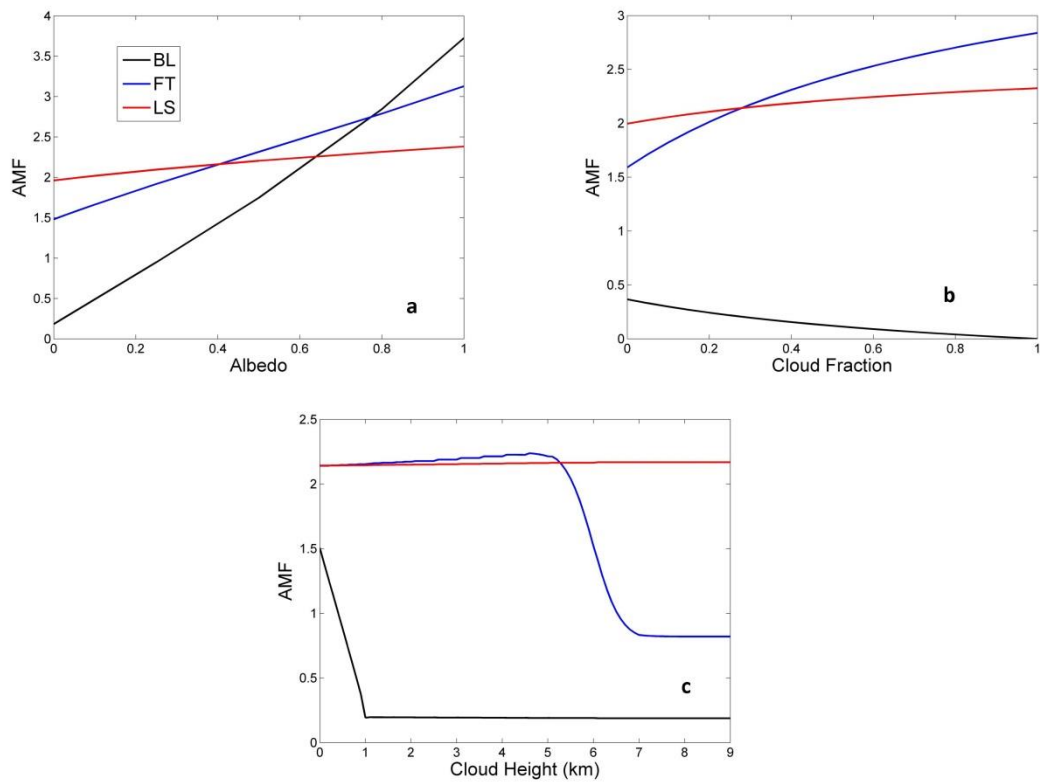

1

2 Figure 8. Air mass factors at 313 nm for SO<sub>2</sub> in the boundary layer (BL :0-1 km), free-  
 3 troposphere and lower stratosphere (FT, LS: Gaussian profiles with maximum height at 6,15  
 4 km and FWHM: 1 km). Calculations are for SZA=40°, Los=10°, RAA=0° and surface height=0  
 5 km. AMFs are displayed as a function of the (a) albedo for clear-sky conditions, (b) cloud  
 6 fraction for albedo=0.06, cloud albedo=0.8 and cloud top height=2km and (c) cloud top  
 7 height for albedo=0.06, cloud albedo=0.8 and cloud fraction=0.3.

8

9

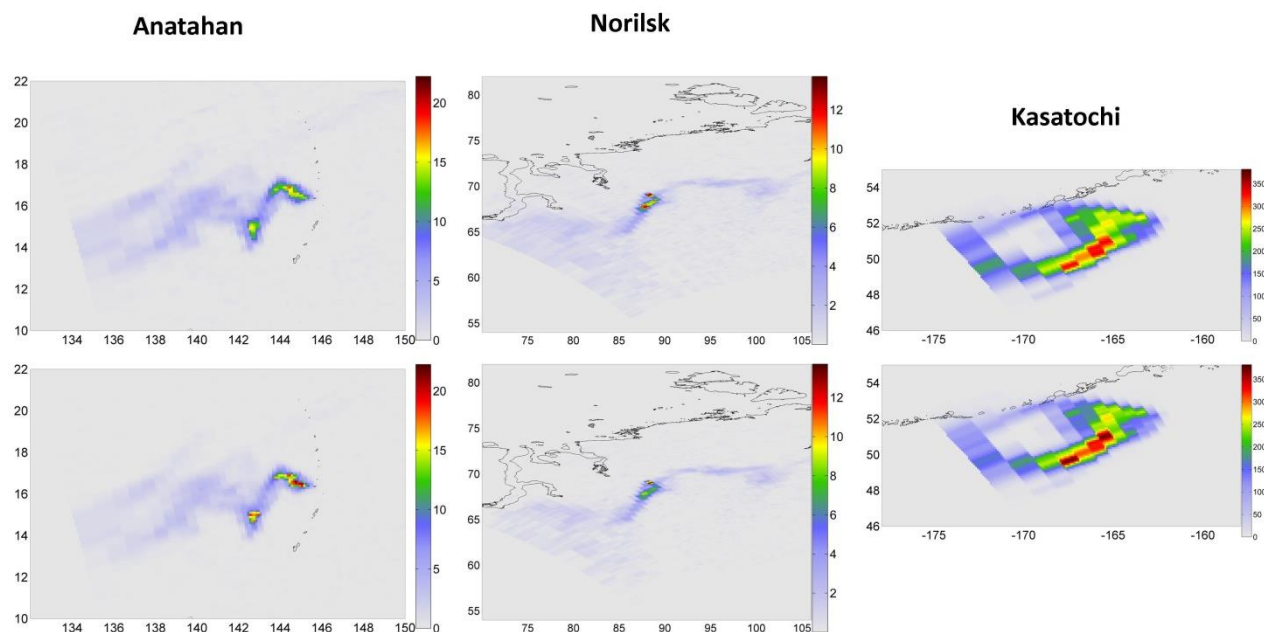

1  
2 Figure 9. OMI SO<sub>2</sub> VCD (expressed in DU) for the Verification (upper panels) and Prototype  
3 Algorithms (lower panels) for the three selected scenarios: during the Anatahan eruption  
4 (left), over the Norilsk copper smelter area (center) and for the volcanic eruption of  
5 Kasatochi (right). Note that, for each case, the colorbar has been scaled to the maximum SO<sub>2</sub>  
6 VCD from both algorithms.



### Anatahan

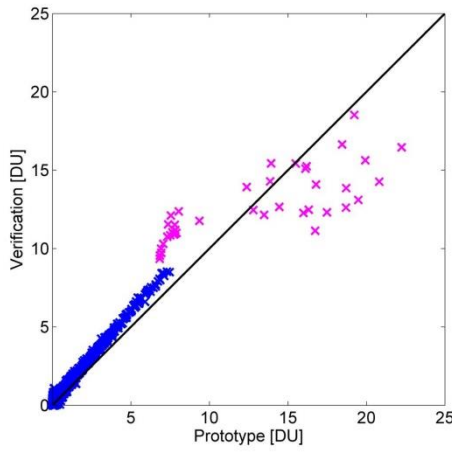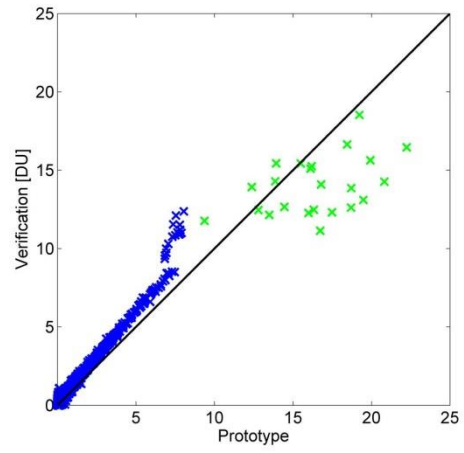

### Norilsk

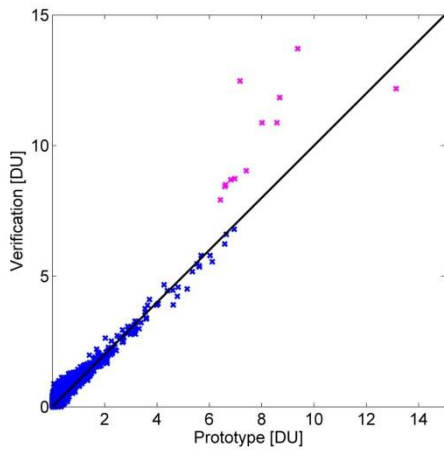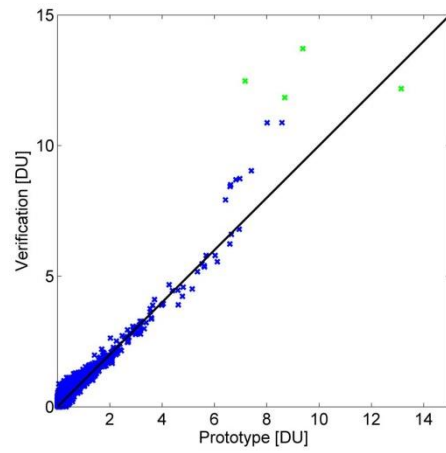

### Kasatochi

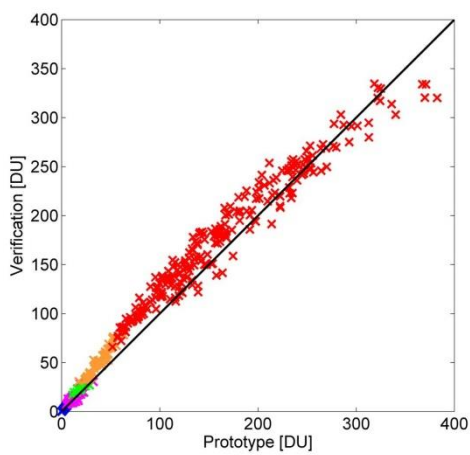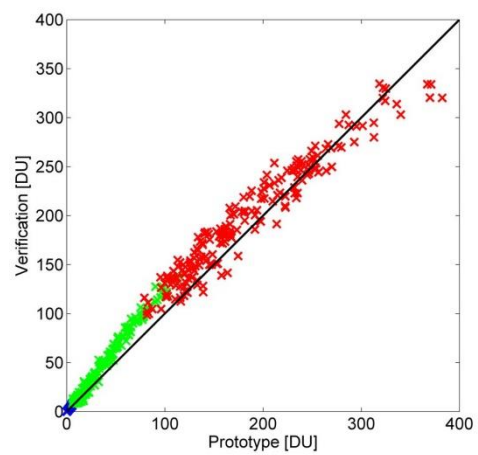

1

2 Figure 10. OMI SO<sub>2</sub> VCD (DU) scatter plots for PA (x-axis) and VA (y-axis) for the three test  
3 cases, Anatahan eruption, Norilsk anthropogenic emissions and Kasatochi eruption (from top



to bottom). The different fit windows used for both algorithms are color-coded: VA on left panels (blue: SR, purple: SR/MR, green: MR, orange: MR/AR, red: AR), PA on right panels (blue: 312-326 nm, green: 325-335 nm, red: 360-390 nm). For the three scenarios, the prototype and verification algorithms agree fairly well with  $r^2 \sim 0.9$ .

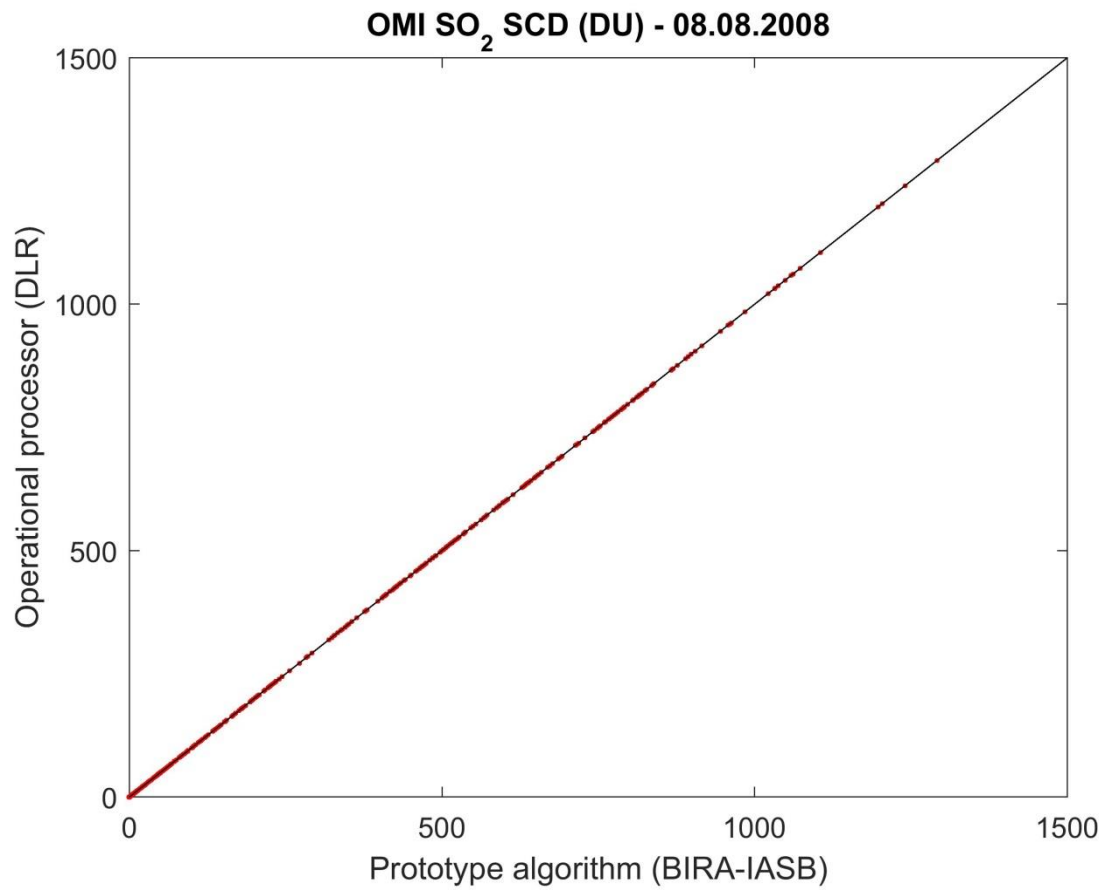

1

2 Figure 11. Comparison of SO<sub>2</sub> SCDs between prototype algorithm and operational processor  
3 for the OMI test data of August 8, 2008.
